# Supplementary material for: ZnCl2-promoted domino reaction of 2-hydroxybenzonitriles with ketones for synthesis of 1,3-benzoxazin-4-ones
Source: Royal Society of Chemistry journal article supplement (doi:10.1039/d1ra04194k), 2021-01-01

## *Supporting Information*

### **ZnCl<sub>2</sub>-promoted Domino Reaction of 2-Hydroxybenzonitriles with Ketones for Synthesis of Benzoxazinones**

Ziqi Su<sup>a</sup> Hongxin Chai<sup>\*b</sup> Juan Xu<sup>\*c</sup> and Jiarong Li <sup>\*a</sup>

<sup>a</sup> School of Chemistry and Chemical Engineering, Beijing Institute of Technology, Beijing 100081, China.

<sup>b</sup> Shenzhen Xinhua Middle School, Shenzhen, 518000, China.

<sup>c</sup> National Research Institute for Family Planning, Haidian district, No.12, Da Hui Si Road, Beijing 100081, China.

E-mail: jrli@bit.edu.cn, bjchx2017@163.com, xujuan@nrfp.org.cn.

#### **Content**

|                                                                    |     |
|--------------------------------------------------------------------|-----|
| Crystal data and structure refinement for <b>3a</b>                | S2  |
| The <sup>1</sup> H-NMR and <sup>13</sup> C-NMR Spectra of products | S4  |
| HR-MS of new products                                              | S19 |



## Crystal data and structure refinement for **3a**

The crystal structure of **3a** was assigned to THF. A summary of the crystal data is given in Table **S1** and **S2**, with the structure depicted in the main text, where ellipsoids have been drawn at the 50% probability level. Single crystals of **3a** were mounted with glue on glass fiber and crystal data were collected on the Xcalibur, Eos, Gemini diffractometer equipped with graphite-monochromated MoK $\alpha$  radiation ( $\lambda = 0.7107$  Å). Empirical absorption correction was applied using the SADABS program. The structures were solved by direct methods and refined by full-matrix least squares on  $F^2$  using the SHELXL-97 (Sheldrick, 1997) program. All non-hydrogen atoms were refined anisotropically, and the hydrogen atoms were generated geometrically and treated by a mixture of independent and constrained refinement.

Crystallographic data (excluding structure factors) for the structure in this paper have been deposited with the Cambridge Crystallographic Data Centre as supplementary publication no. CCDC 1536185 (**3a**). Copies of the data can be obtained, free of charge, on application to CCDC, 12 Union Road, Cambridge CB2 1EZ, UK, (fax: +44 (0)1223 336033 or e-mail: [deposit@ccdc.cam.ac.uk](mailto:deposit@ccdc.cam.ac.uk)).

**Table S1**

Crystallographic Data and Structure Refinement for compound **3a**

| Identification code                  | <b>3a</b>                                       |
|--------------------------------------|-------------------------------------------------|
| Empirical formula                    | C <sub>13</sub> H <sub>15</sub> NO <sub>2</sub> |
| Formula weight                       | 217.26                                          |
| Temperature / K                      | 104.9                                           |
| Crystal system                       | monoclinic                                      |
| Space group                          | P2 <sub>1</sub> /n                              |
| a / Å, b / Å, c / Å                  | 6.8238(3), 14.8389(7), 10.8490(3)               |
| $\alpha$ /°, $\beta$ /°, $\gamma$ /° | 90.00, 96.975(3), 90.00                         |

|                                                                                         |                                                   |
|-----------------------------------------------------------------------------------------|---------------------------------------------------|
| Volume / Å <sup>3</sup>                                                                 | 1090.41(8)                                        |
| Z                                                                                       | 4                                                 |
| $\rho_{\text{calc}}$ / mg mm <sup>-3</sup>                                              | 1.323                                             |
| $\mu$ / mm <sup>-1</sup>                                                                | 0.089                                             |
| F(000)                                                                                  | 464                                               |
| Crystal size / mm <sup>3</sup>                                                          | 0.45 × 0.45 × 0.40                                |
| 2 $\Theta$ range for data collection                                                    | 3.3 to 29.6°                                      |
| Index ranges                                                                            | -8 ≤ h ≤ 8, -12 ≤ k ≤ 18, -13 ≤ l ≤ 8             |
| Reflections collected                                                                   | 4531                                              |
| Independent reflections                                                                 | 2146[R(int) = 0.0216 (inf-0.9Å)]                  |
| Data/restraints/parameters                                                              | 2146/0/145                                        |
| Goodness-of-fit on F <sup>2</sup>                                                       | 1.050                                             |
| Final R indexes [I>2 $\sigma$ (I) i.e.<br>F <sub>o</sub> >4 $\sigma$ (F <sub>o</sub> )] | R <sub>1</sub> = 0.0396, wR <sub>2</sub> = 0.0877 |
| Final R indexes [all data]                                                              | R <sub>1</sub> = 0.0486, wR <sub>2</sub> = 0.0930 |
| Largest diff. peak/hole / e Å <sup>-3</sup>                                             | 0.209/-0.256                                      |
| Flack Parameters                                                                        | N                                                 |
| Completeness                                                                            | 0.999                                             |

**Table S2**

**Bond Lengths (Å) and Bond Angles (°) of **3a****

| Bond  | Dist.      | Bond    | Dist.      |
|-------|------------|---------|------------|
| O2-C1 | 1.2424(16) | C4-C5   | 1.386(2)   |
| O1-C3 | 1.3748(16) | C9-C10  | 1.5248(18) |
| O1-C8 | 1.4484(16) | C9-C8   | 1.5286(19) |
| N1-C1 | 1.3449(17) | C10-C11 | 1.5268(19) |
| N1-C8 | 1.4617(16) | C13-C12 | 1.5275(18) |
| C2-C3 | 1.3954(19) | C13-C8  | 1.5180(18) |
| C2-C1 | 1.4820(19) | C5-C6   | 1.395(2)   |

|            |            |             |            |
|------------|------------|-------------|------------|
| C2-C7      | 1.3979(19) | C11-C12     | 1.5294(19) |
| C4-C3      | 1.3921(19) | C7-C6       | 1.386(2)   |
| Angle      | (°)        | Angle       | (°)        |
| C1-O1-C8   | 114.23(10) | O2-C1-N1    | 122.57(12) |
| C1-N1-C8   | 122.15(11) | O2-C1-C2    | 122.83(12) |
| C3-C2-C1   | 118.86(12) | N2-C1-C2    | 114.54(12) |
| C3-C2-C7   | 119.38(12) | C10-C11-C12 | 110.19(11) |
| C7-C2-C1   | 121.72(13) | C6-C7-C2    | 120.13(14) |
| C5-C4-C3   | 118.80(13) | C13-C12-C11 | 111.45(11) |
| C10-C9-C8  | 111.79(11) | O1-C8-N1    | 108.11(10) |
| O1-C3-N2   | 120.52(12) | O1-C8-C9    | 110.29(10) |
| O1-C3-C2   | 118.58(12) | O1-C8-C13   | 106.42(10) |
| C4-C3-C2   | 120.88(13) | N1-C8-C9    | 111.19(11) |
| C9-C10-C11 | 110.80(11) | N1-C8-C13   | 109.34(11) |
| C8-C13-C12 | 112.46(11) | C13-C8-C9   | 111.33(11) |
| C4-C5-C6   | 121.13(13) | C7-C6-C5    | 119.59(13) |

# The $^1\text{H}$ -NMR and $^{13}\text{C}$ -NMR Spectra of products

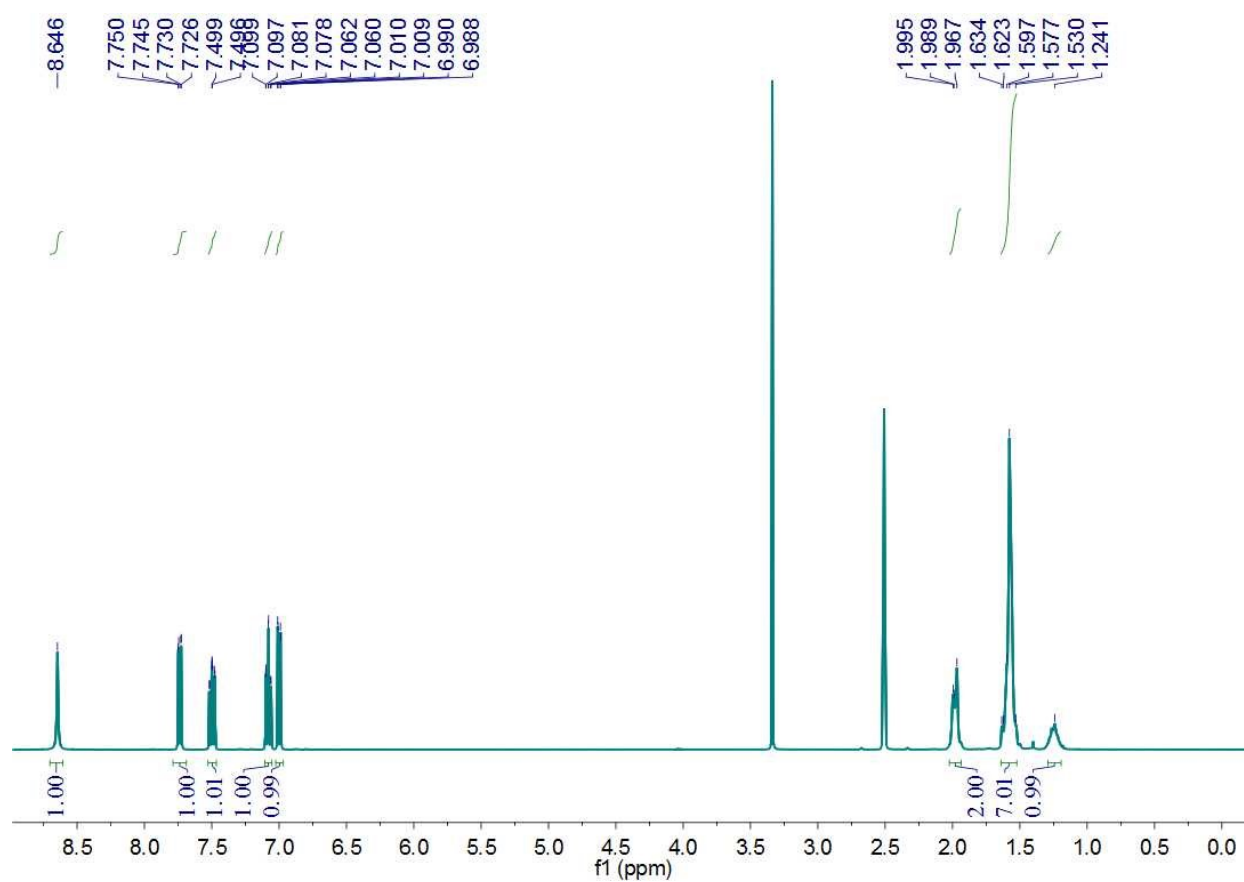

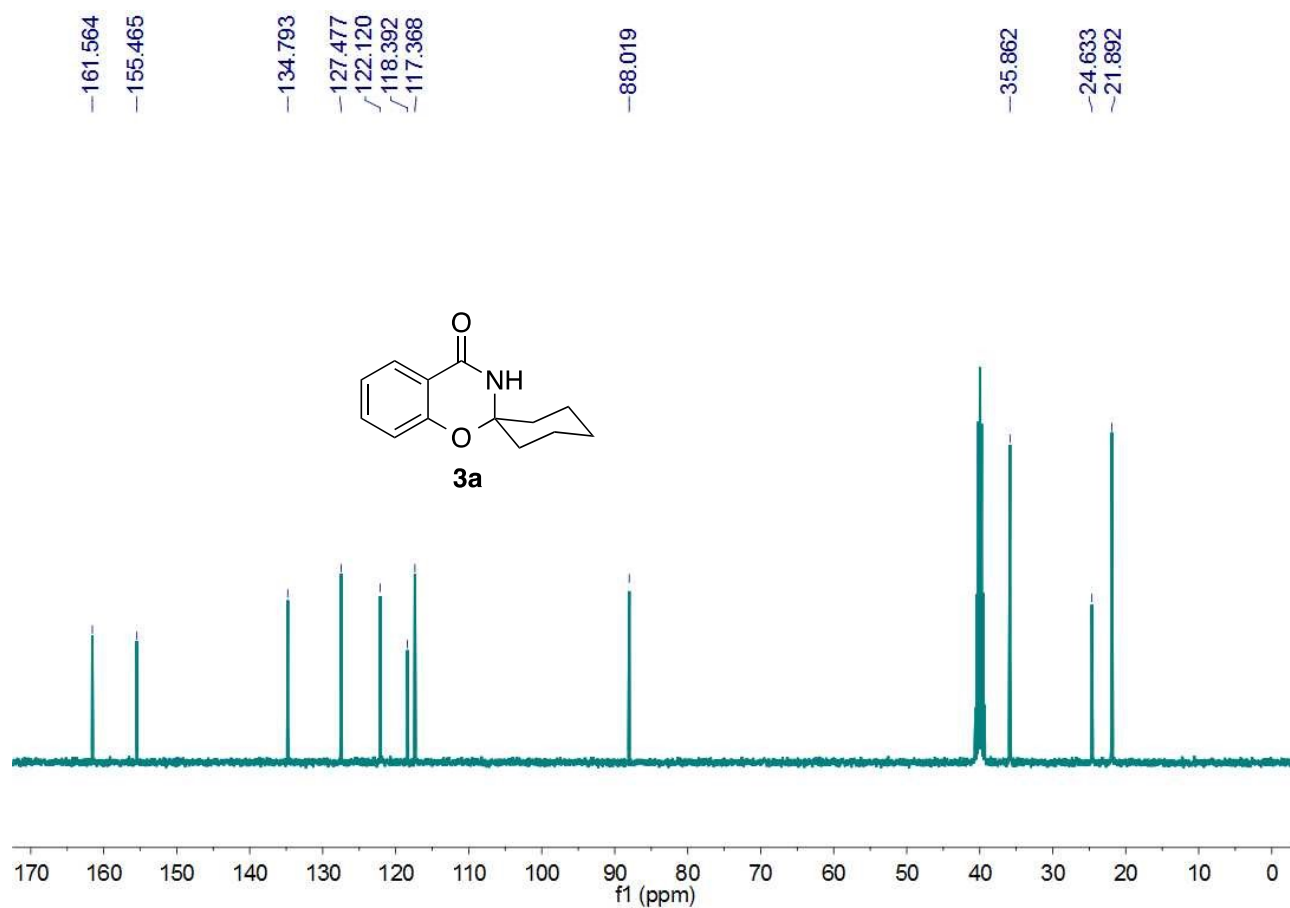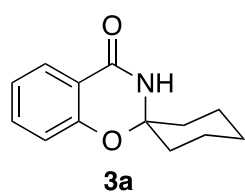

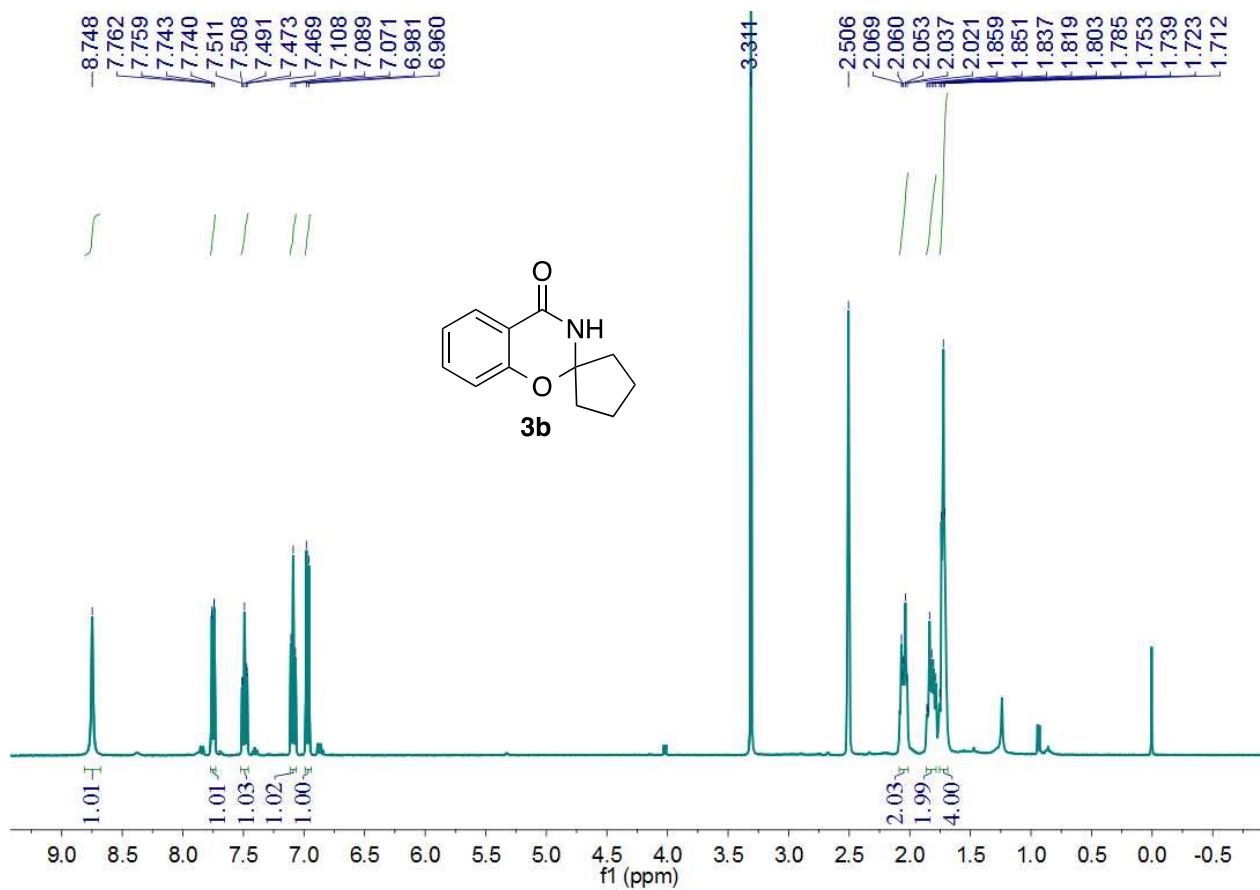



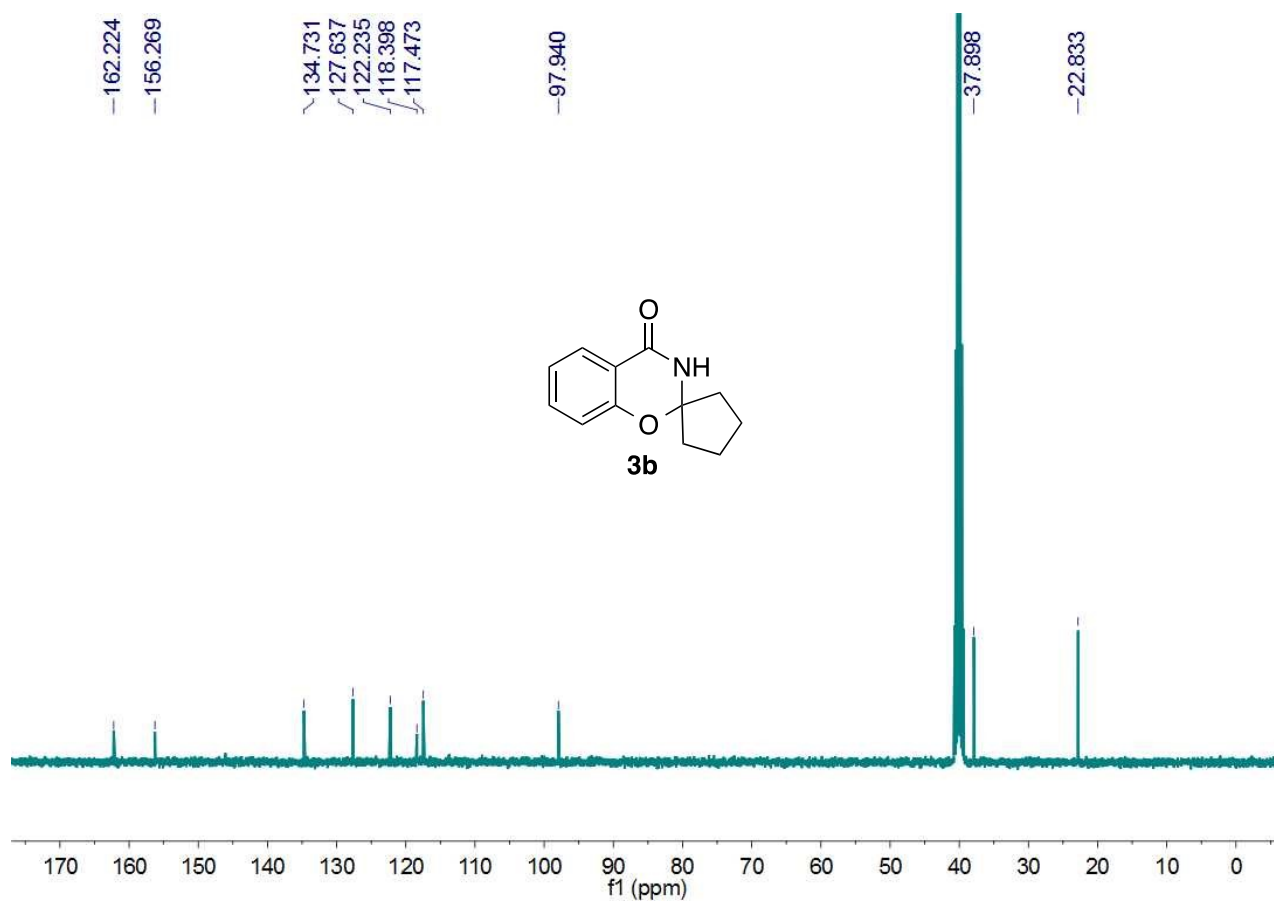

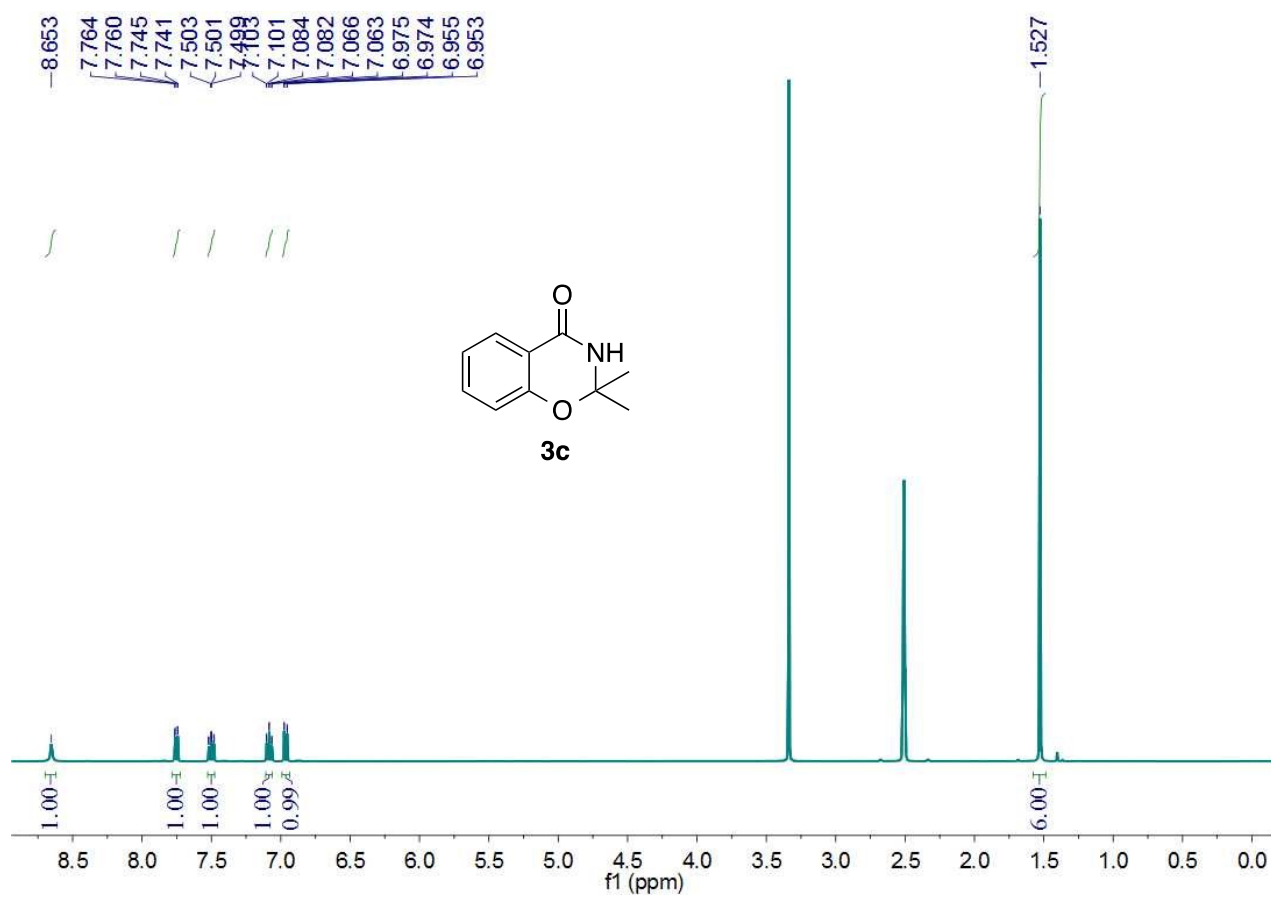

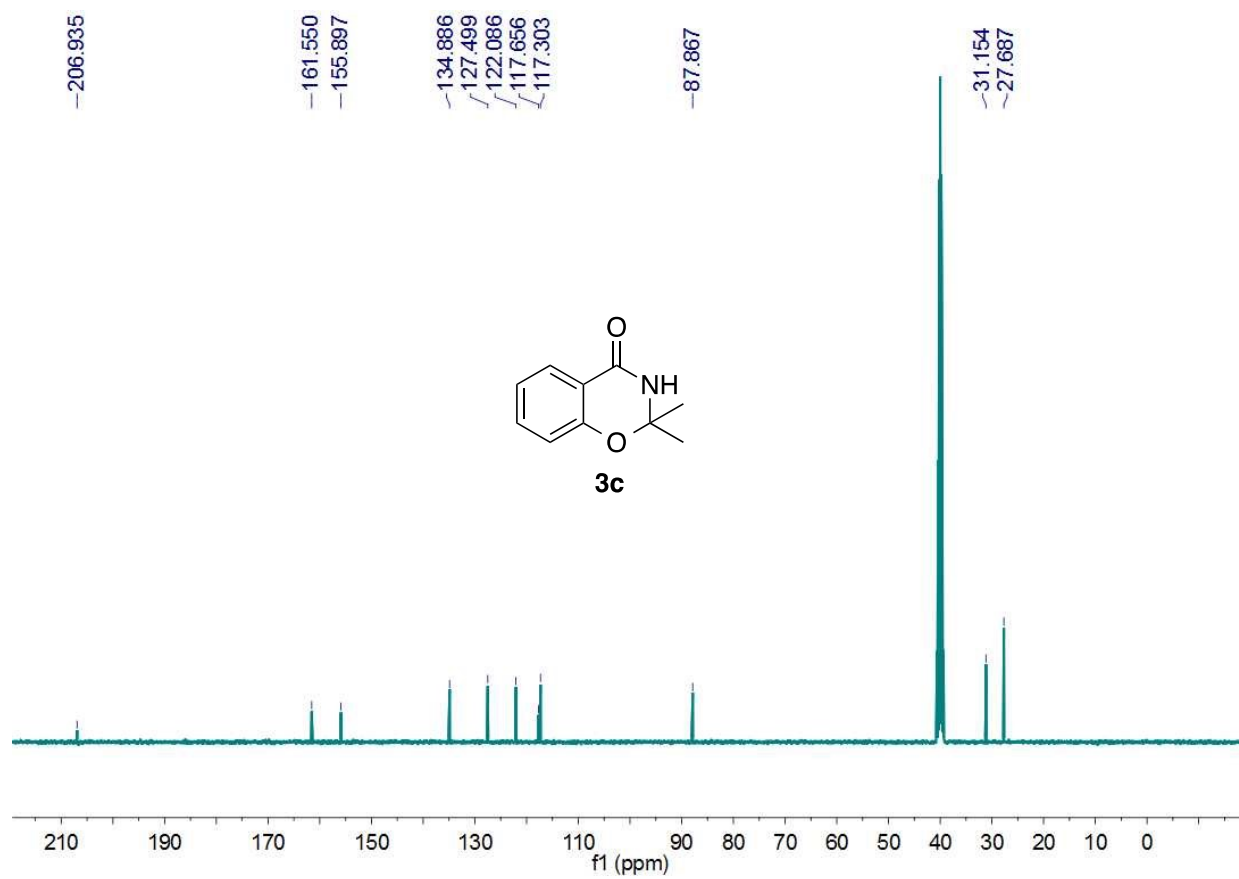

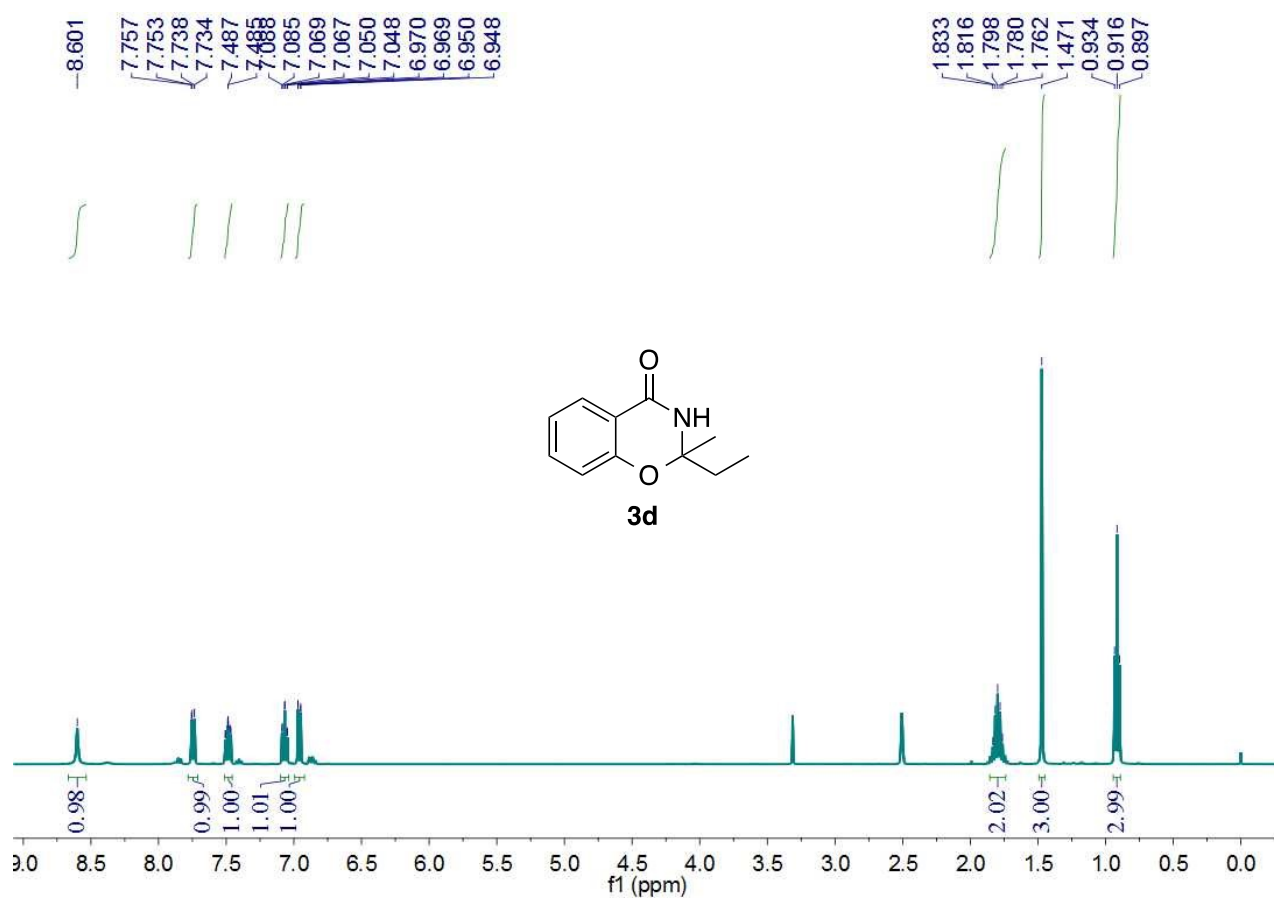

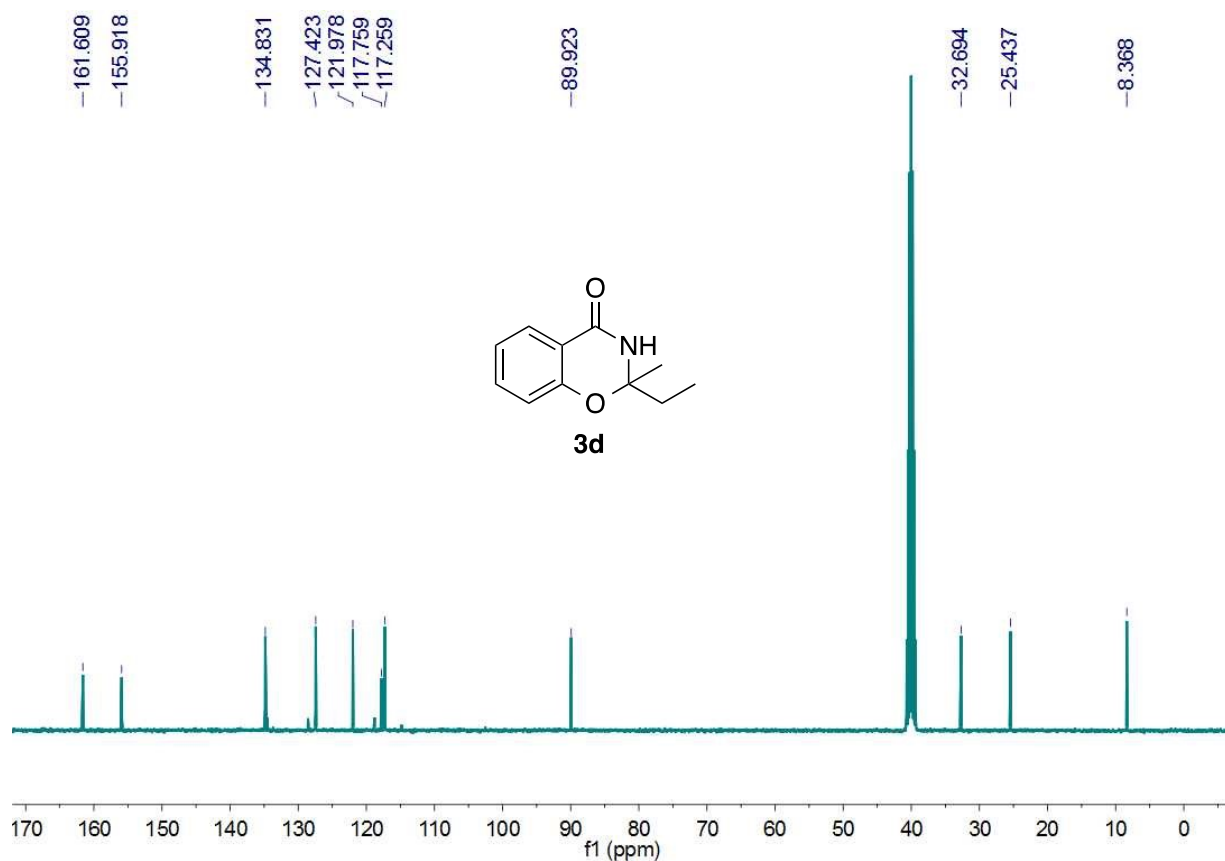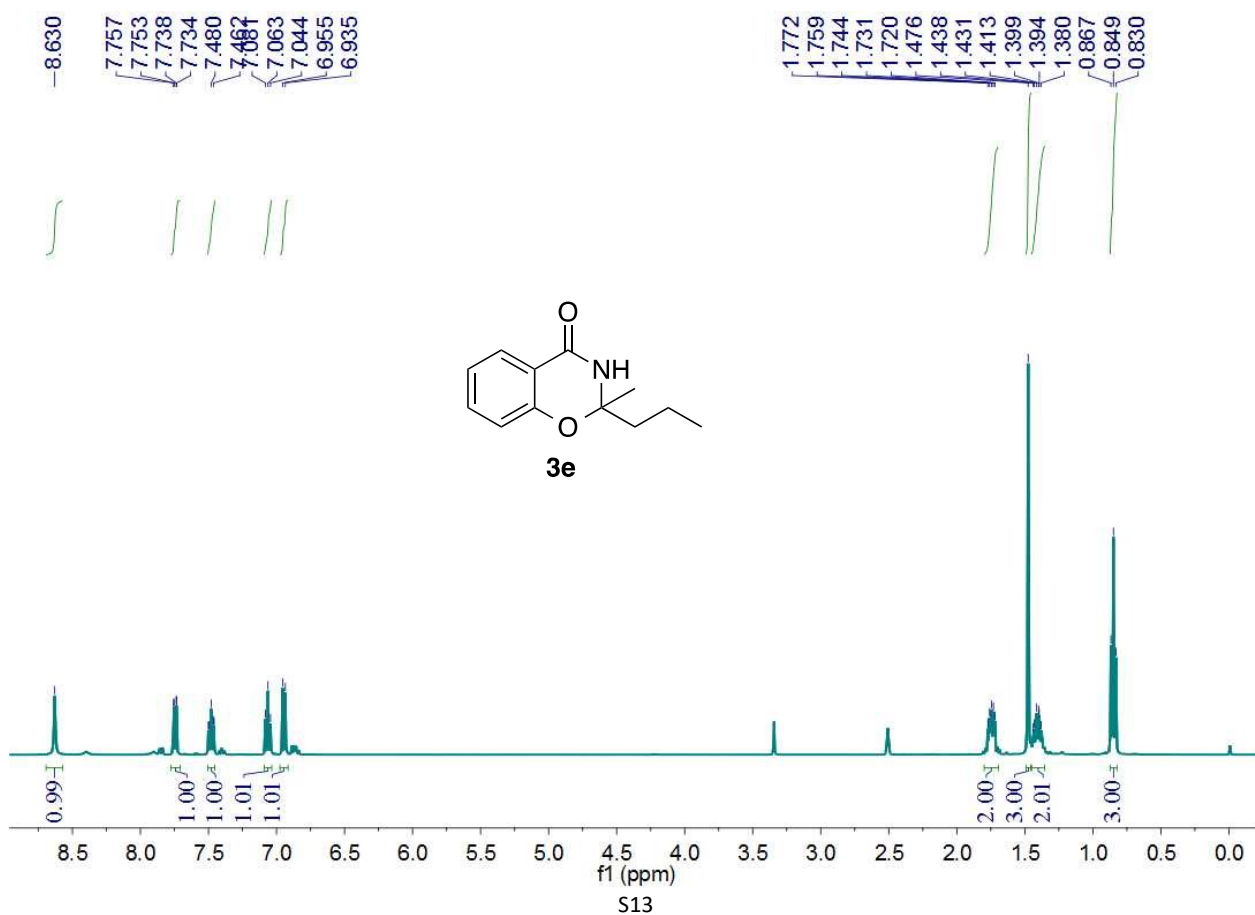

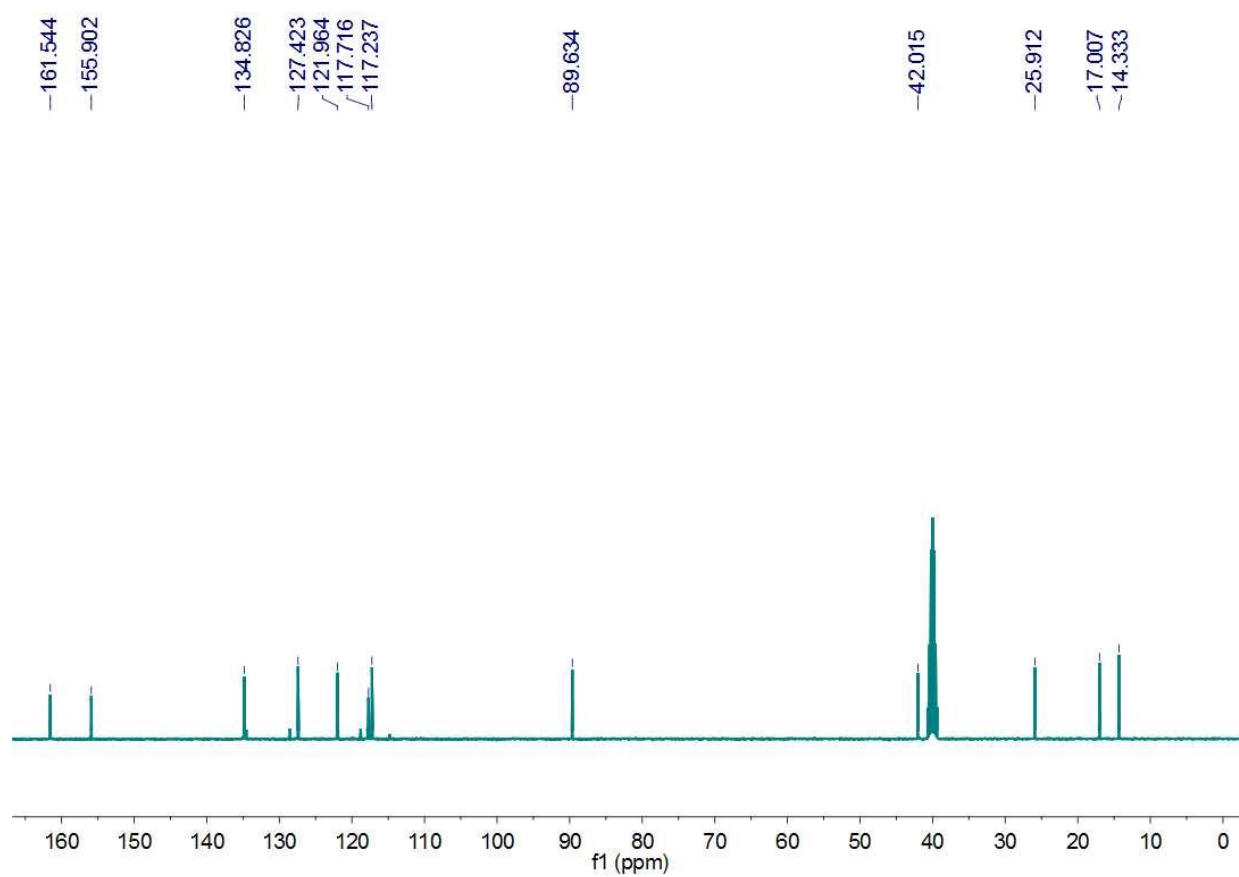

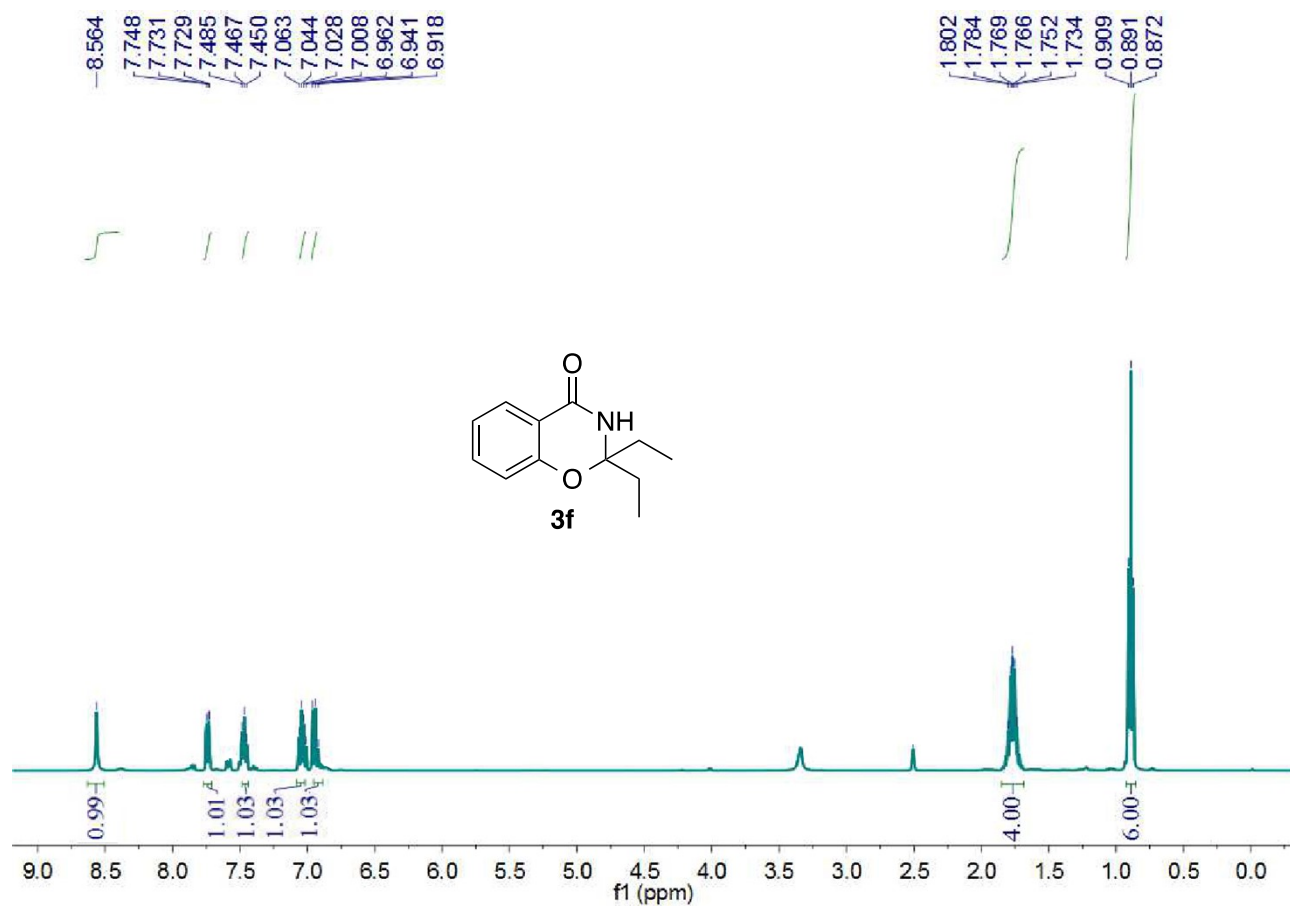

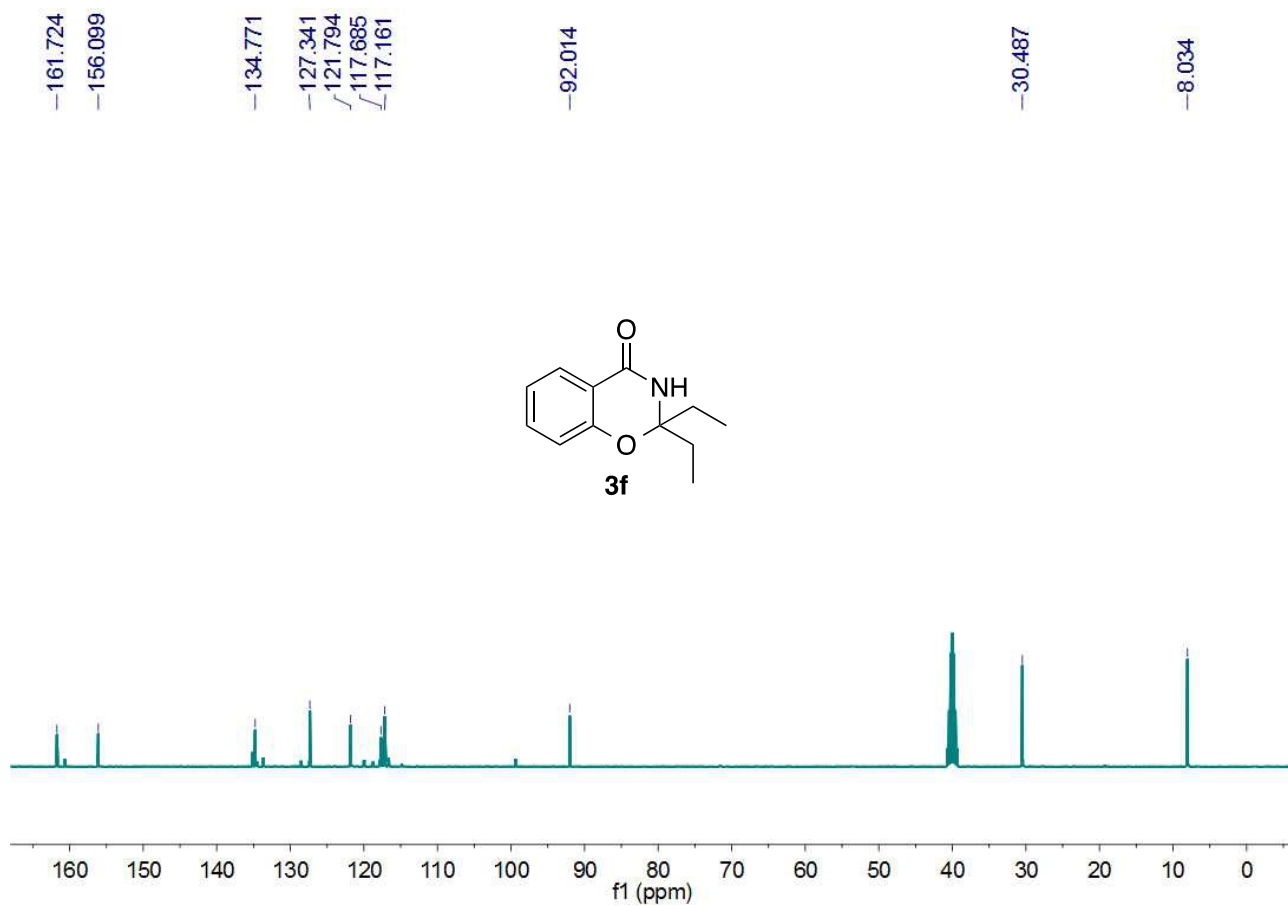



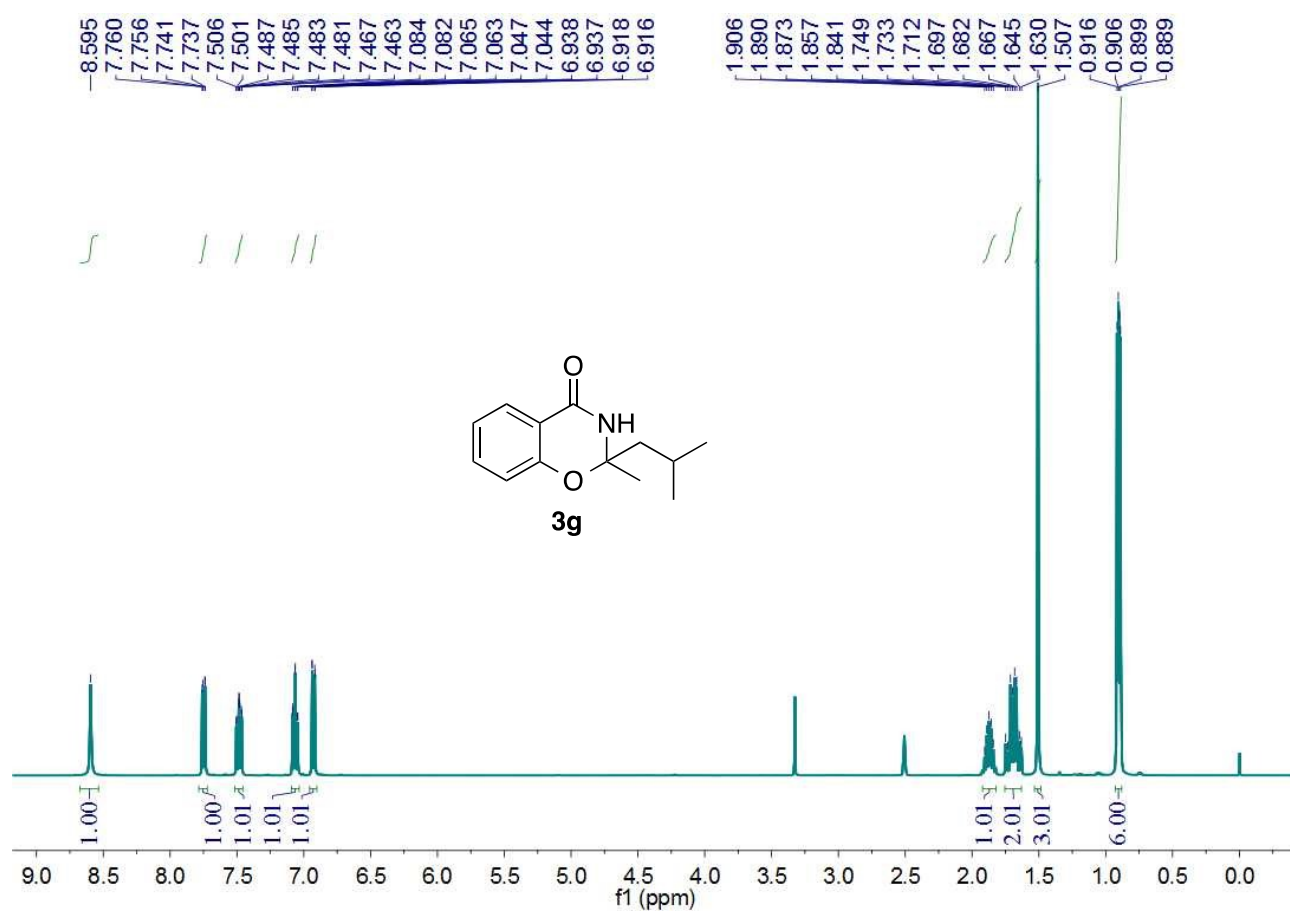

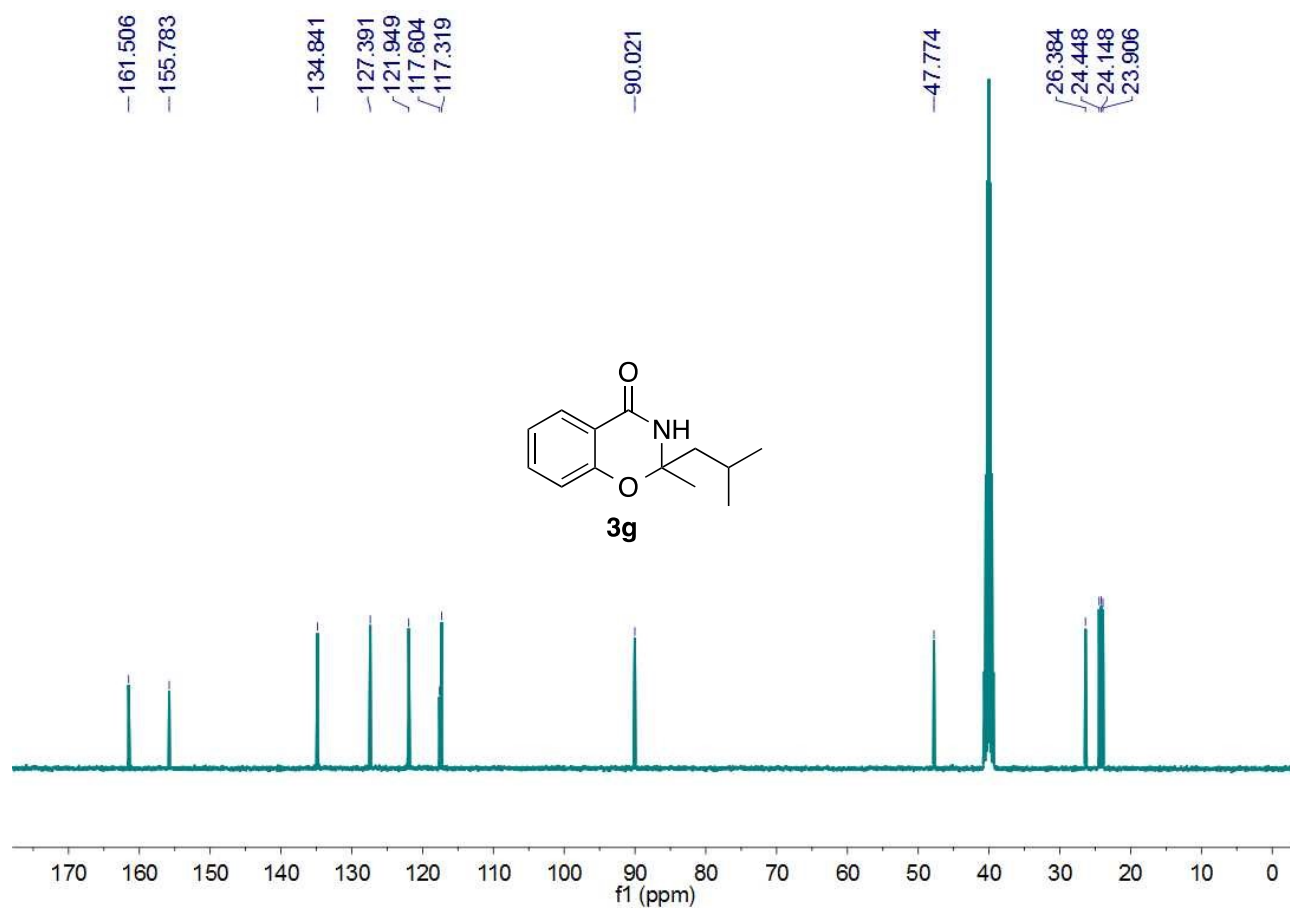

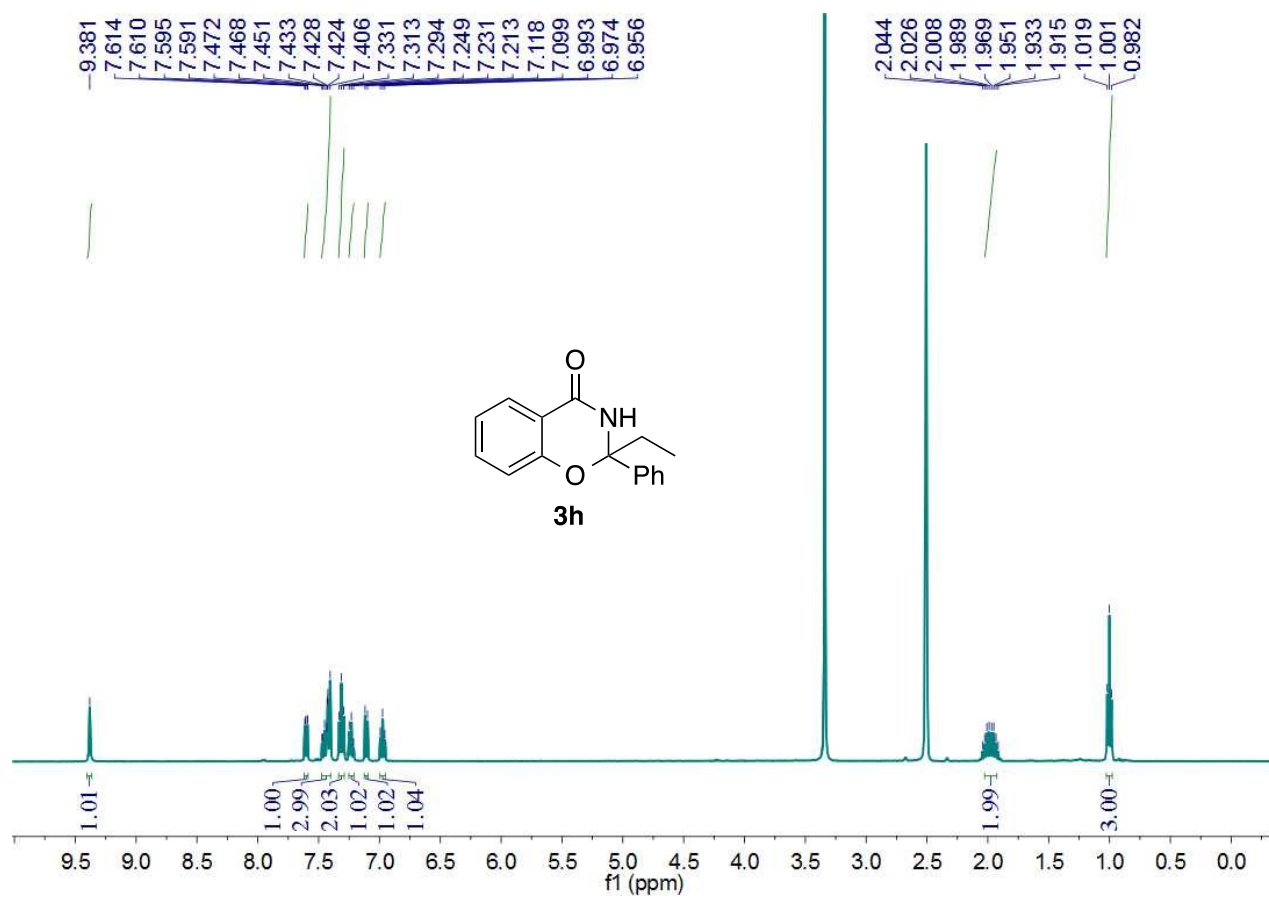

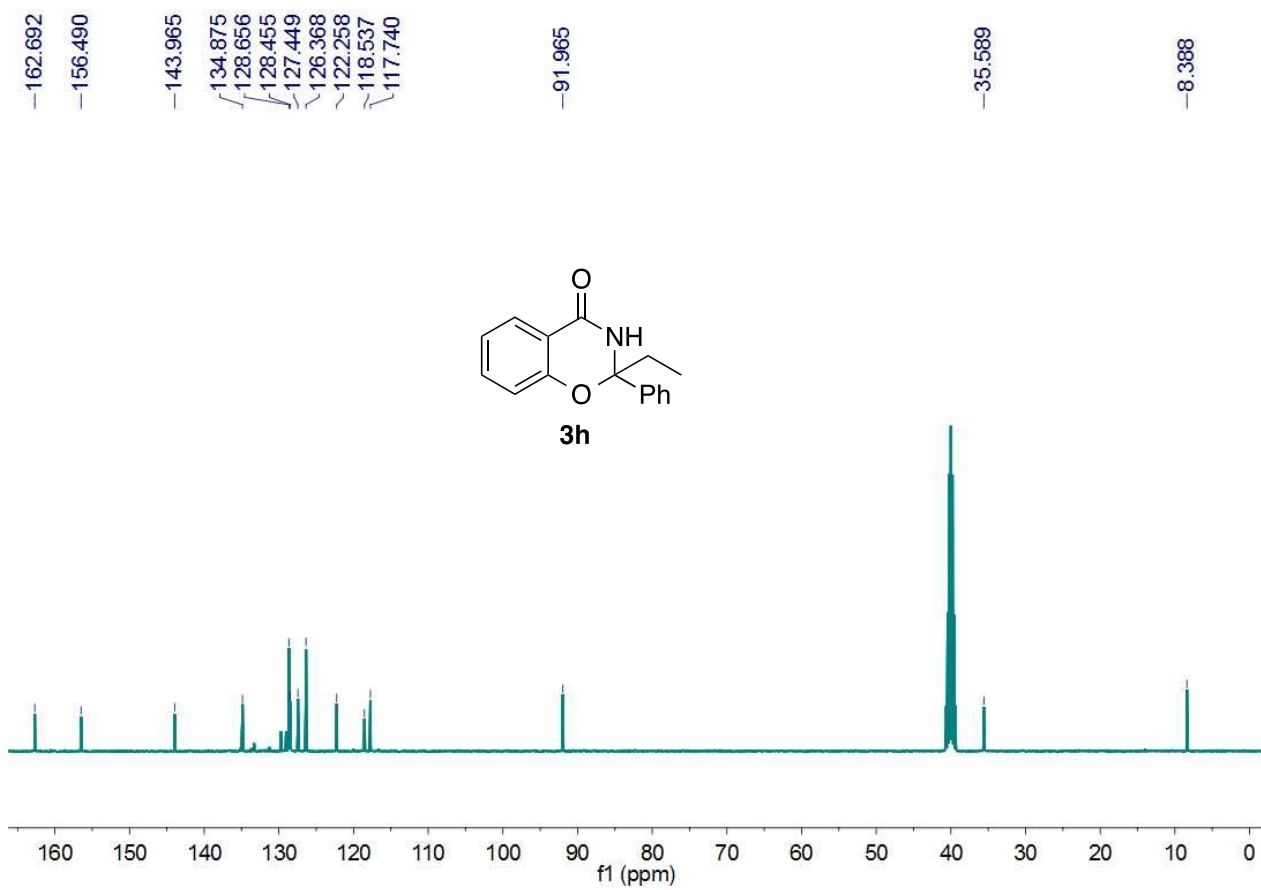

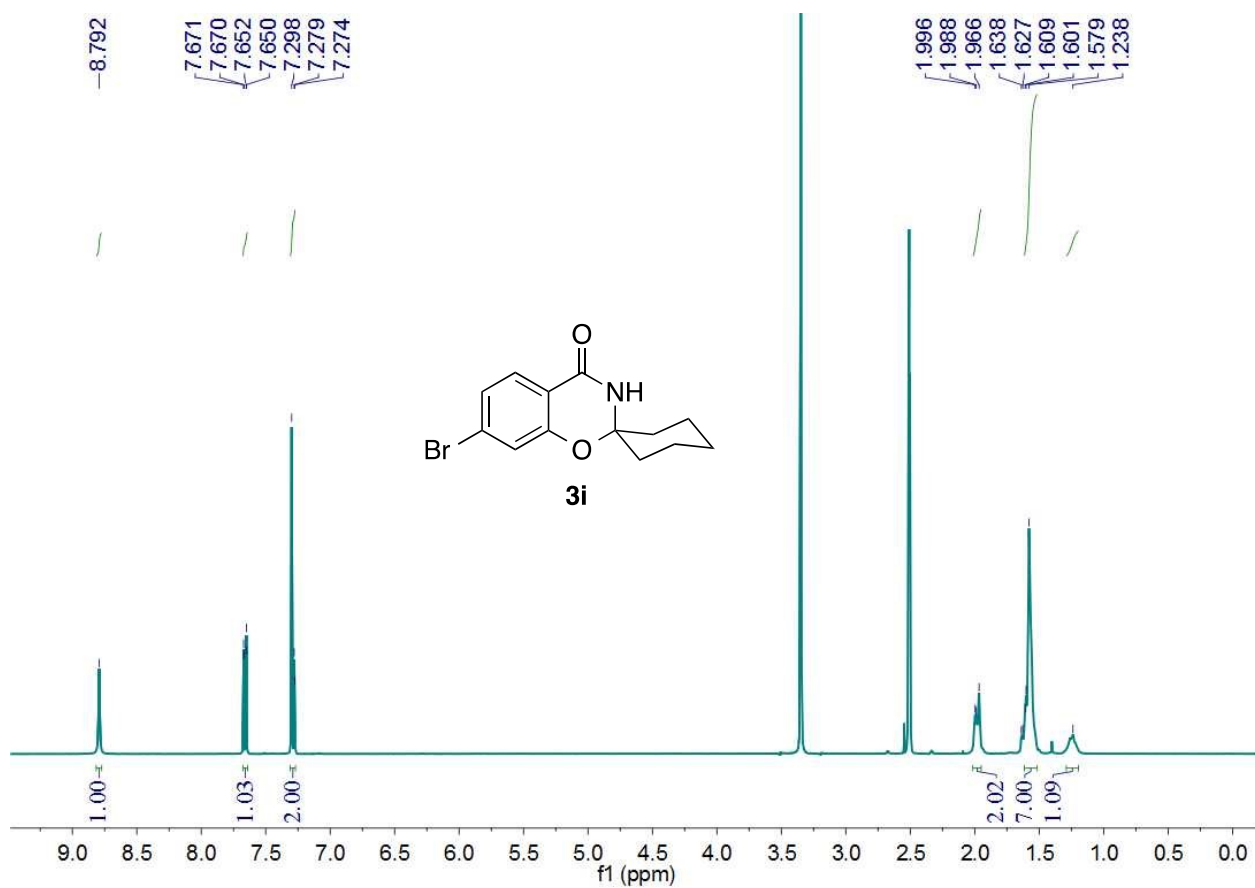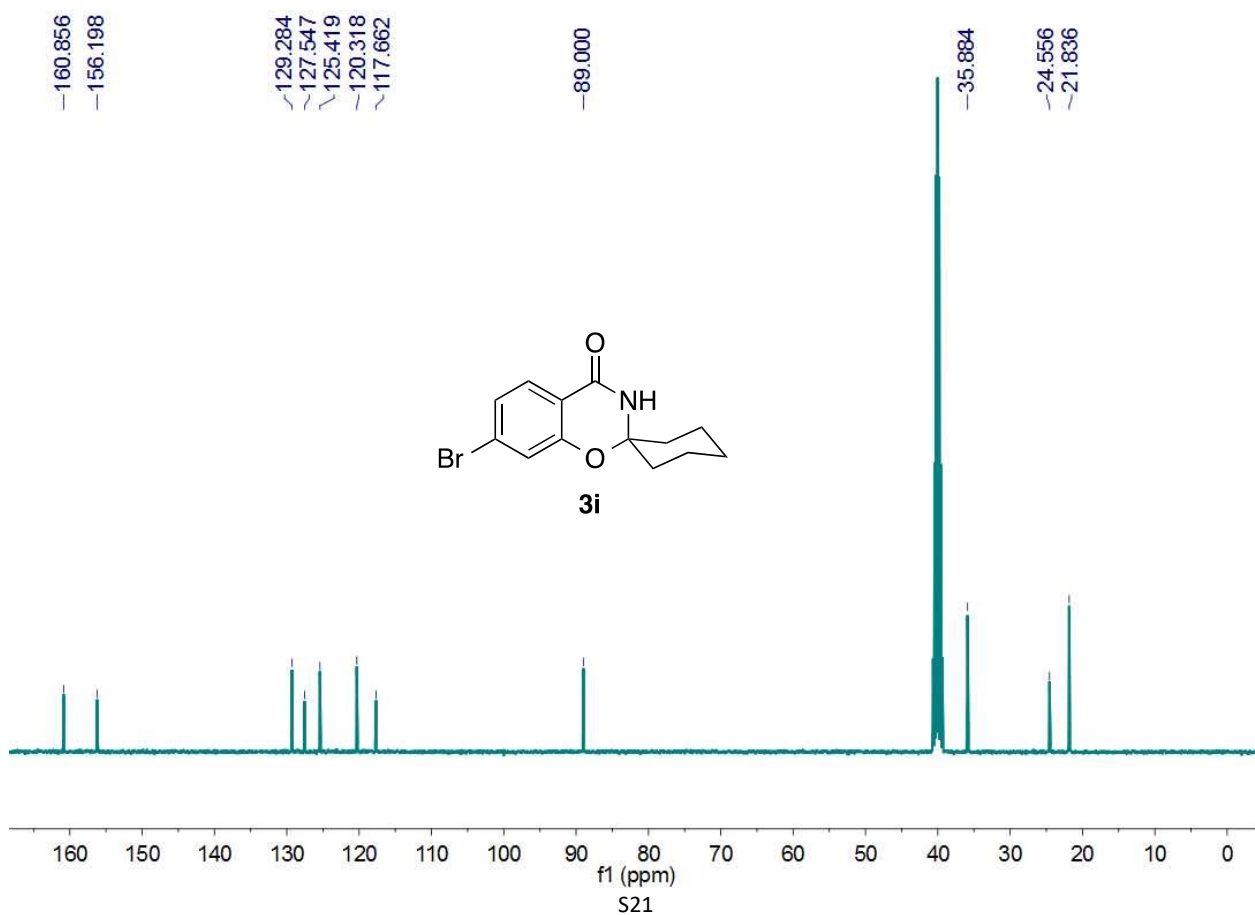

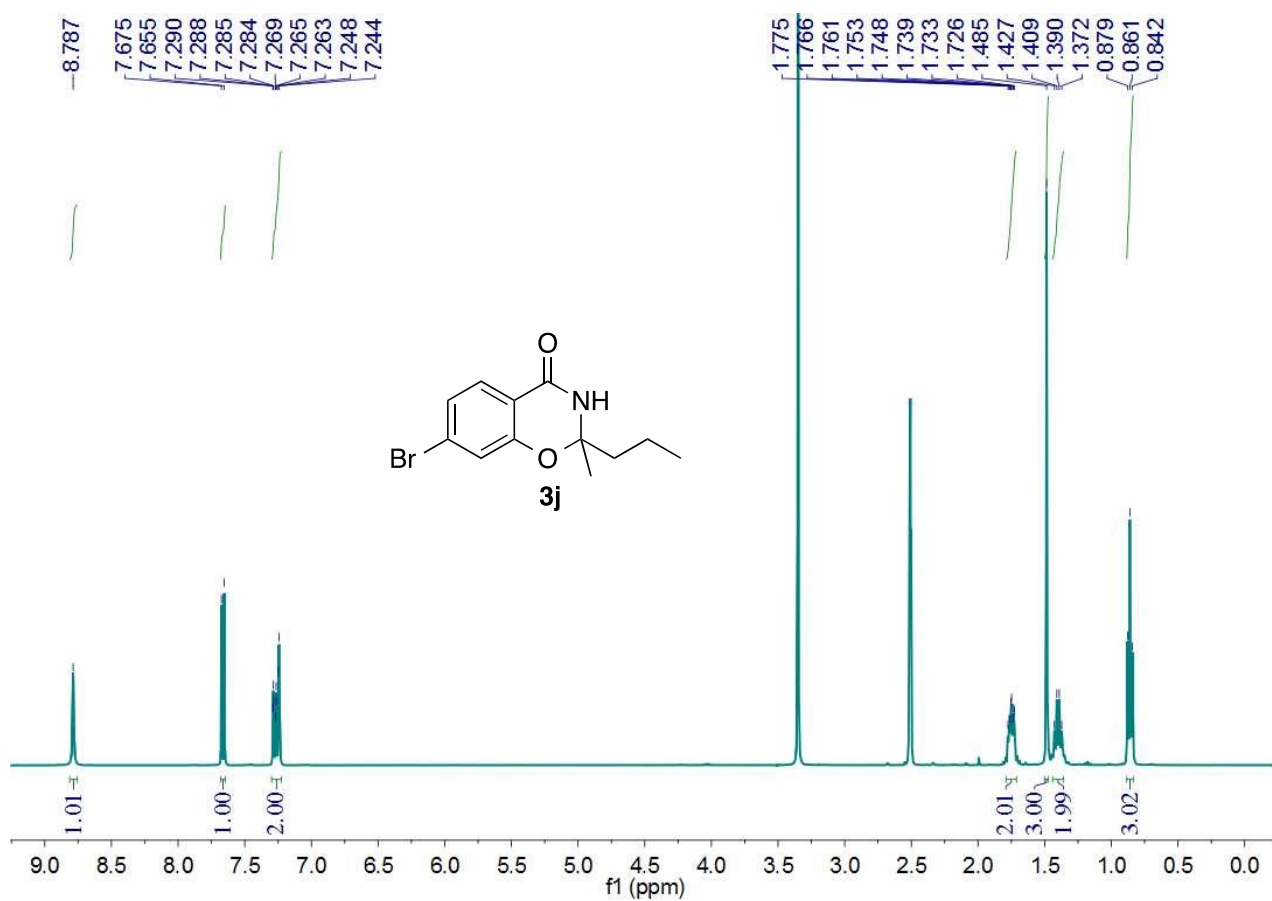

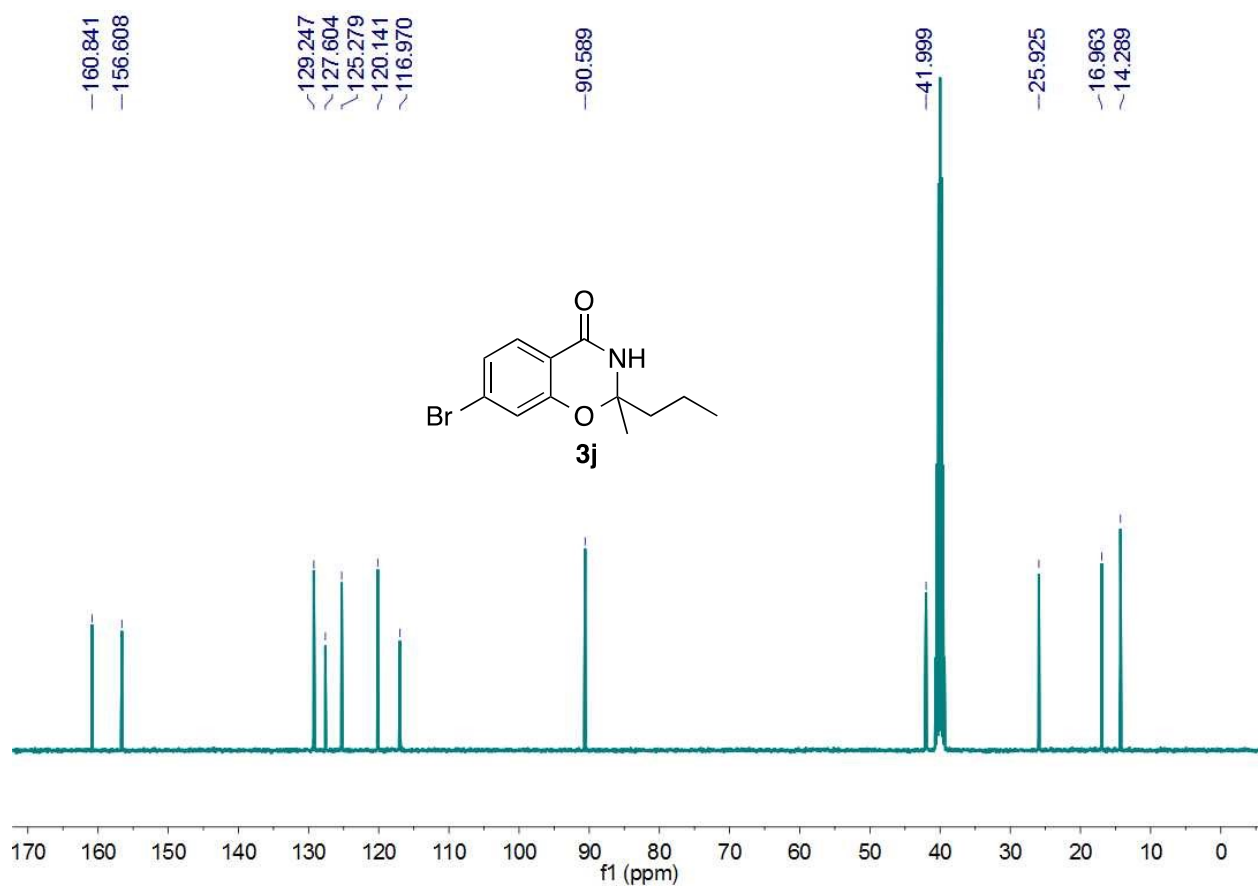

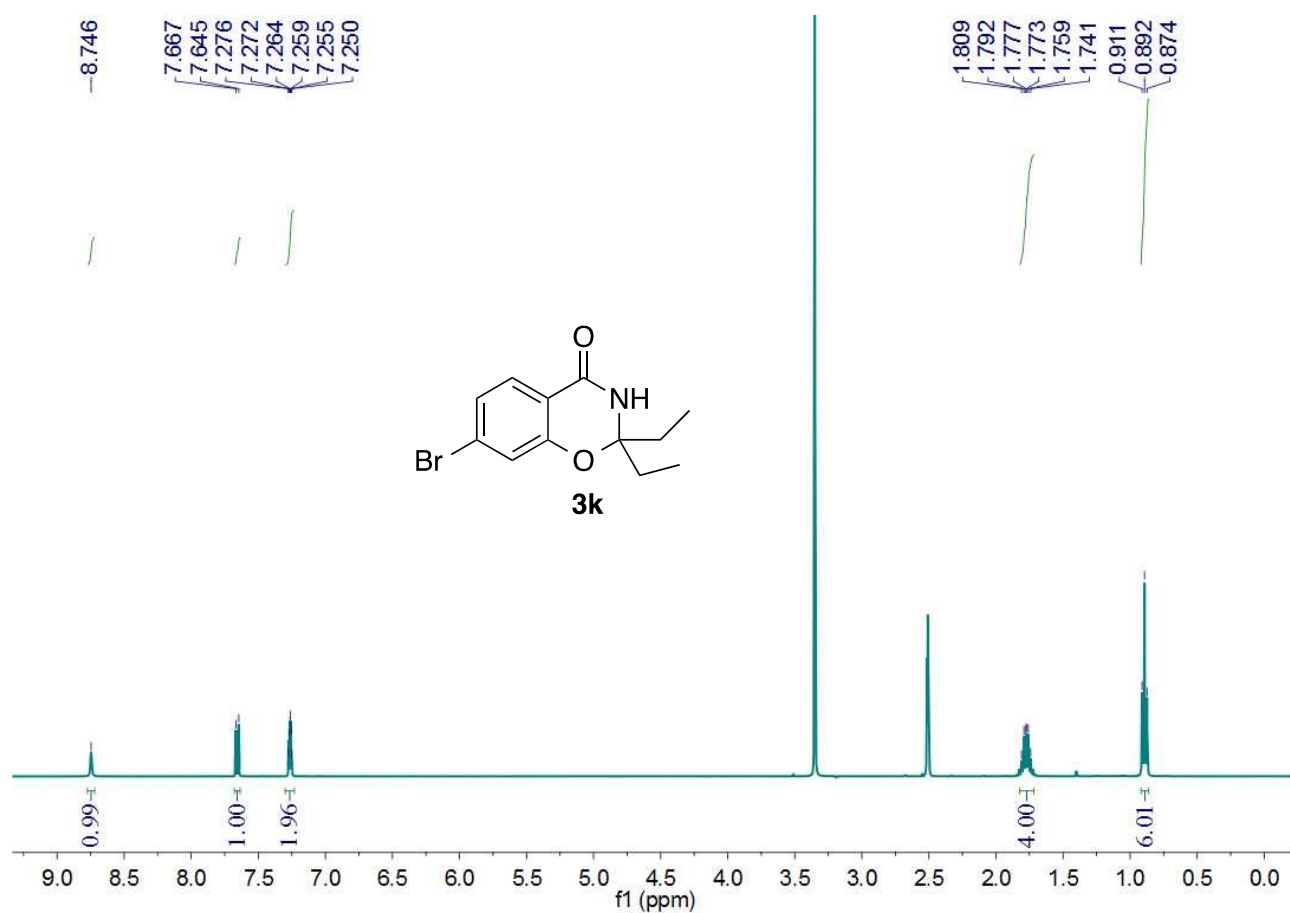



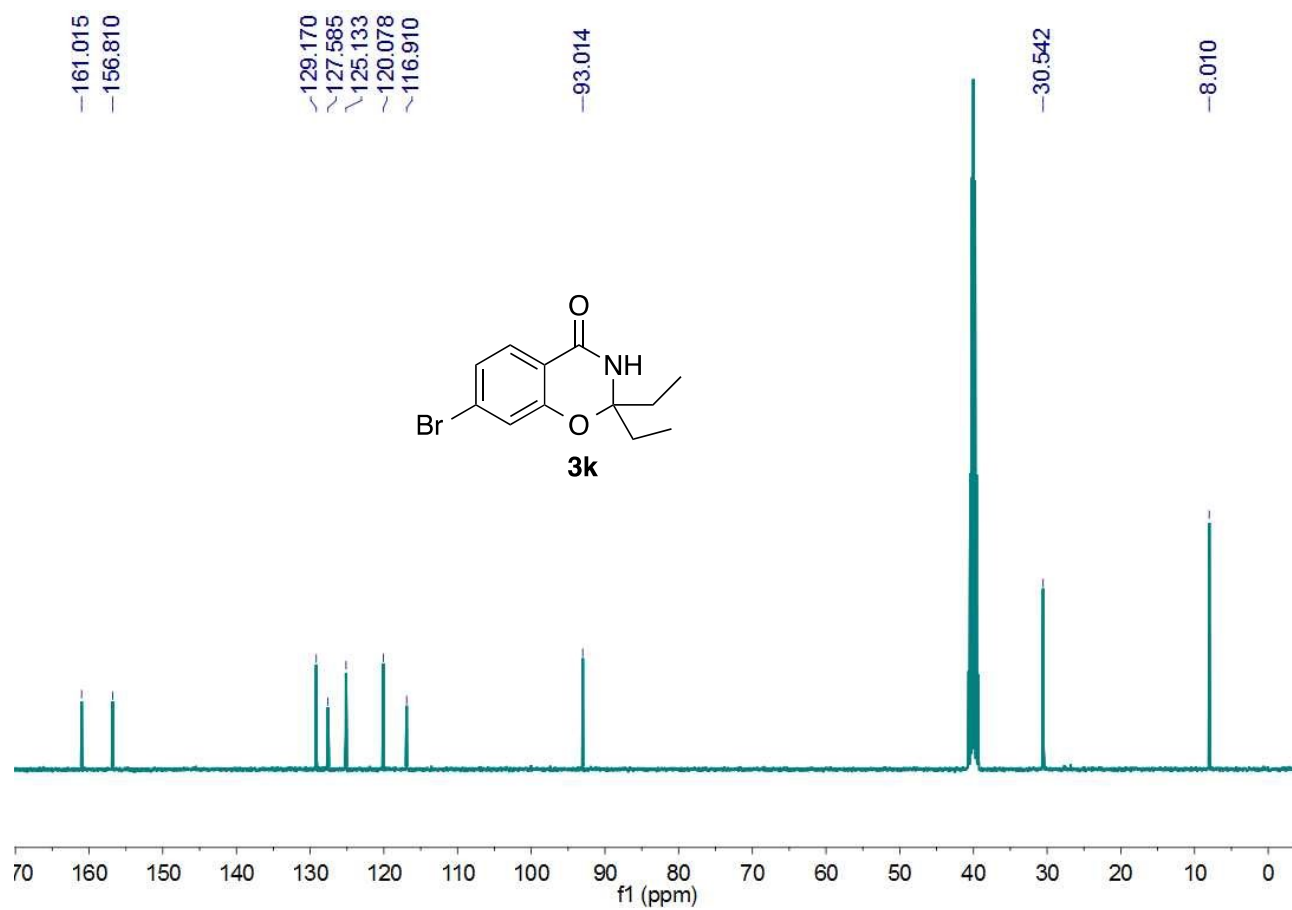

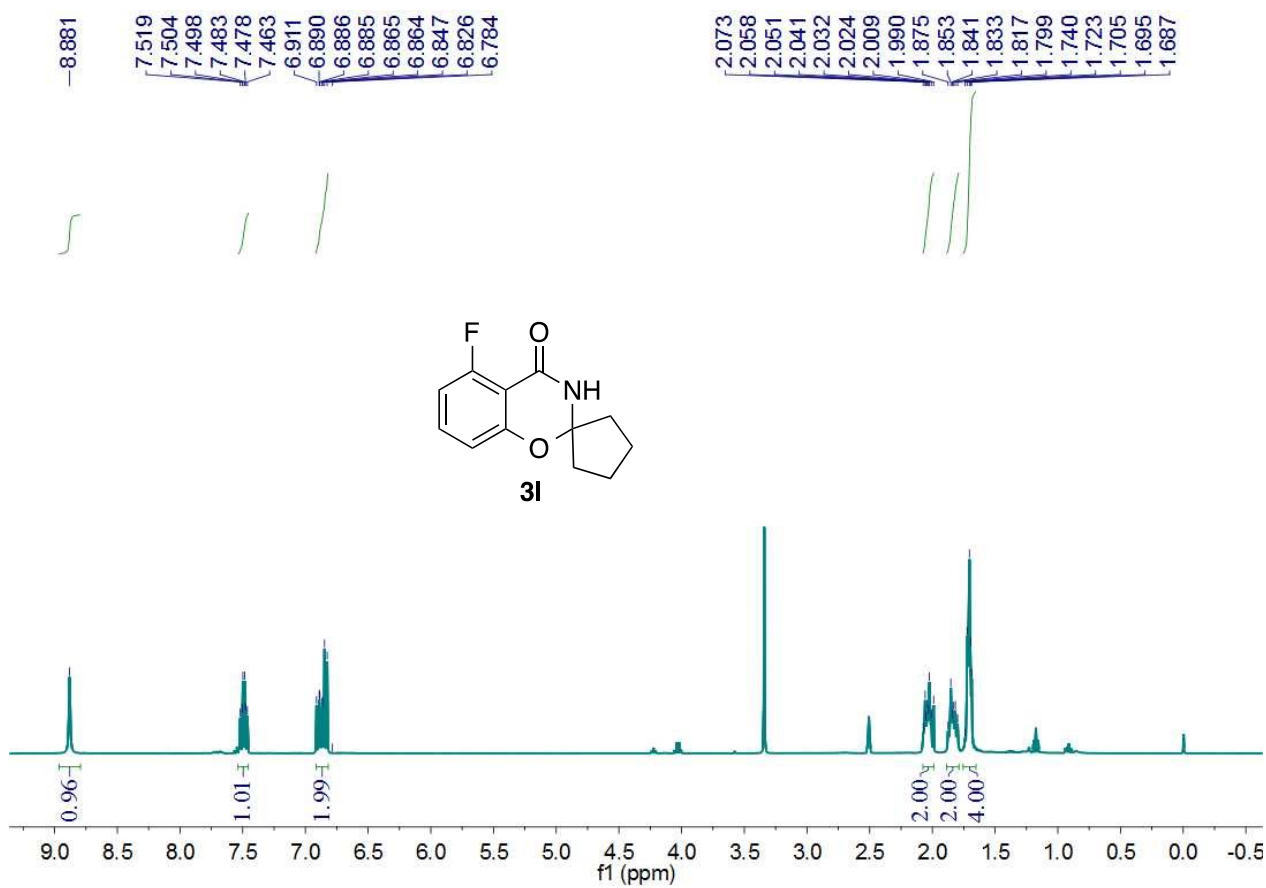

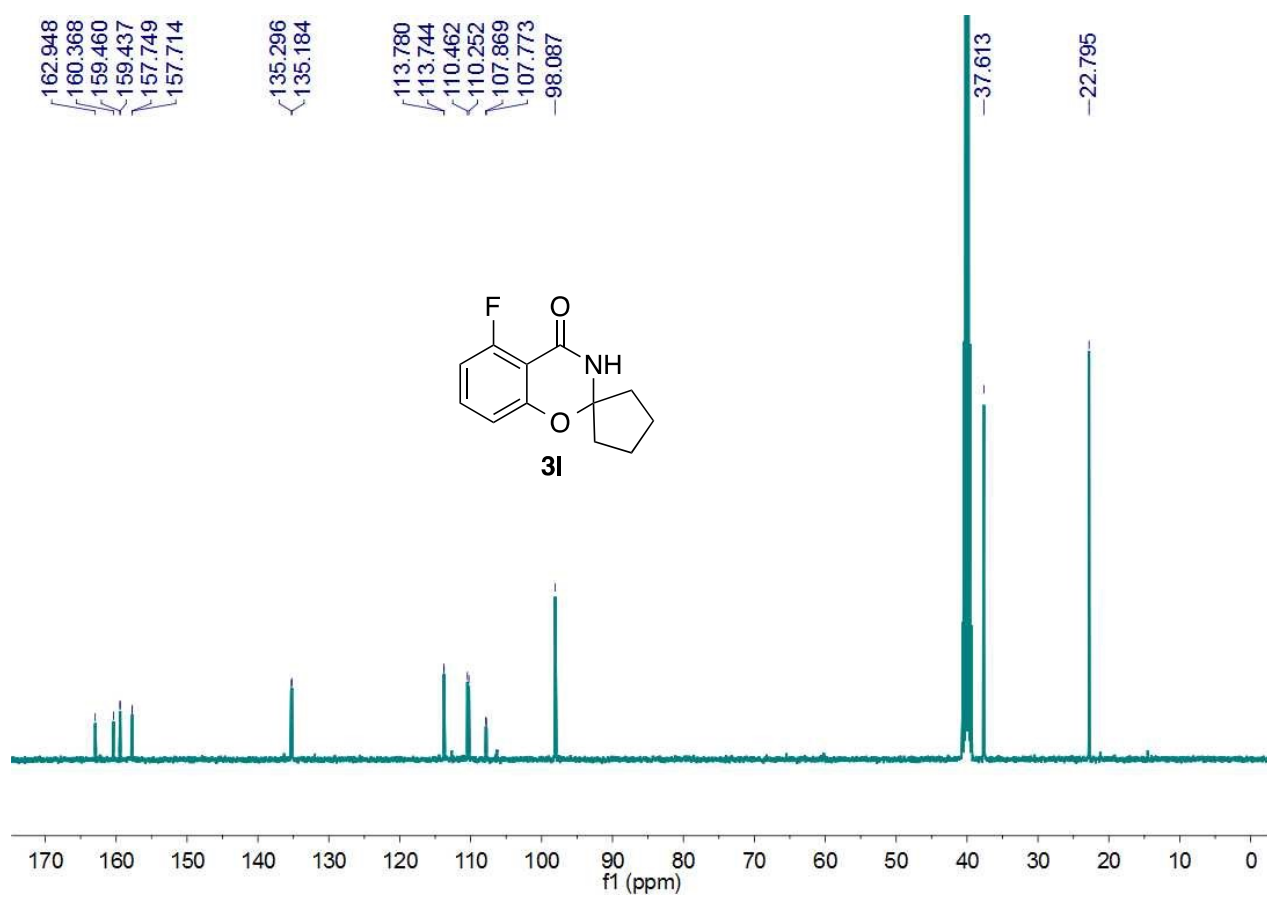

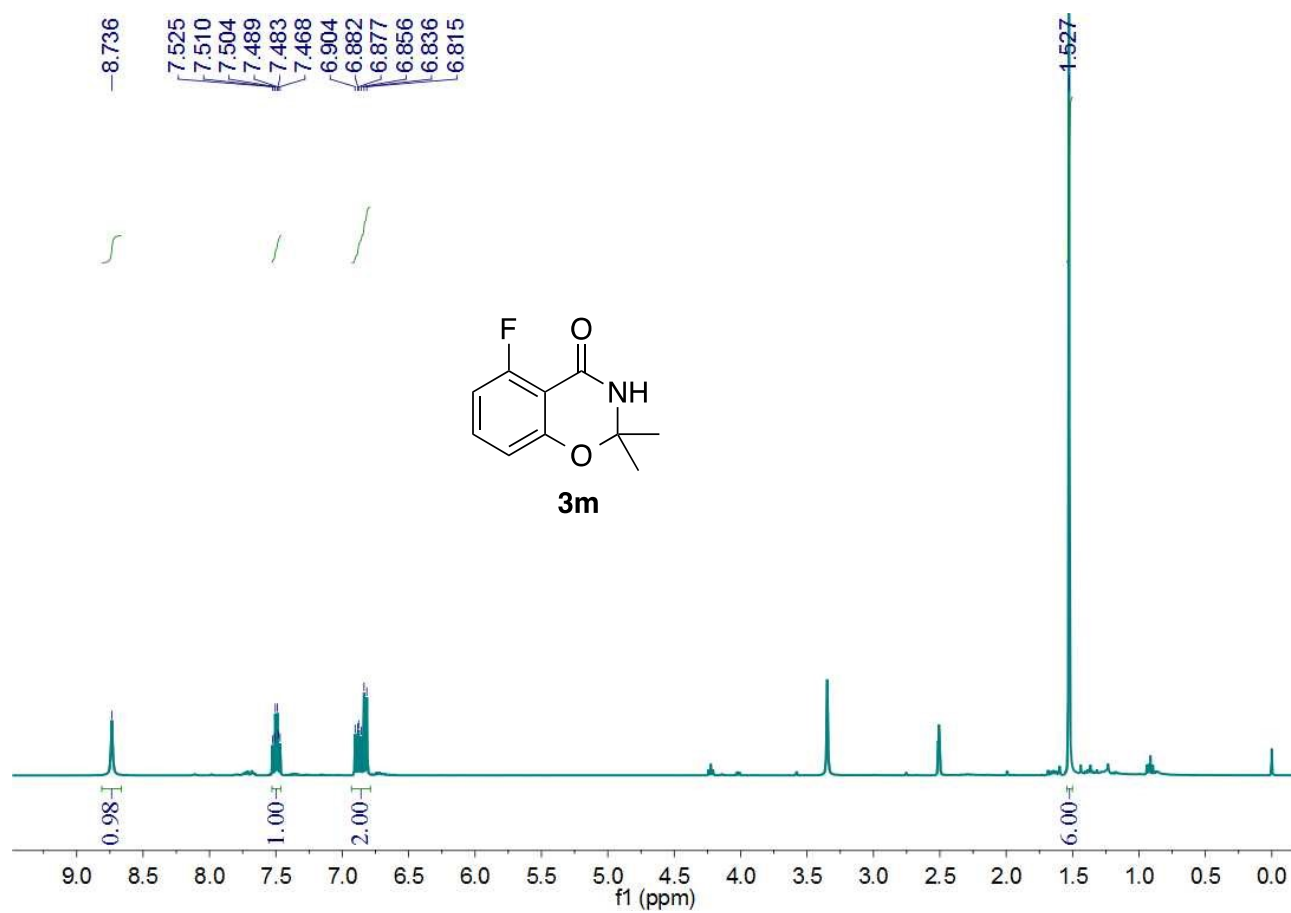

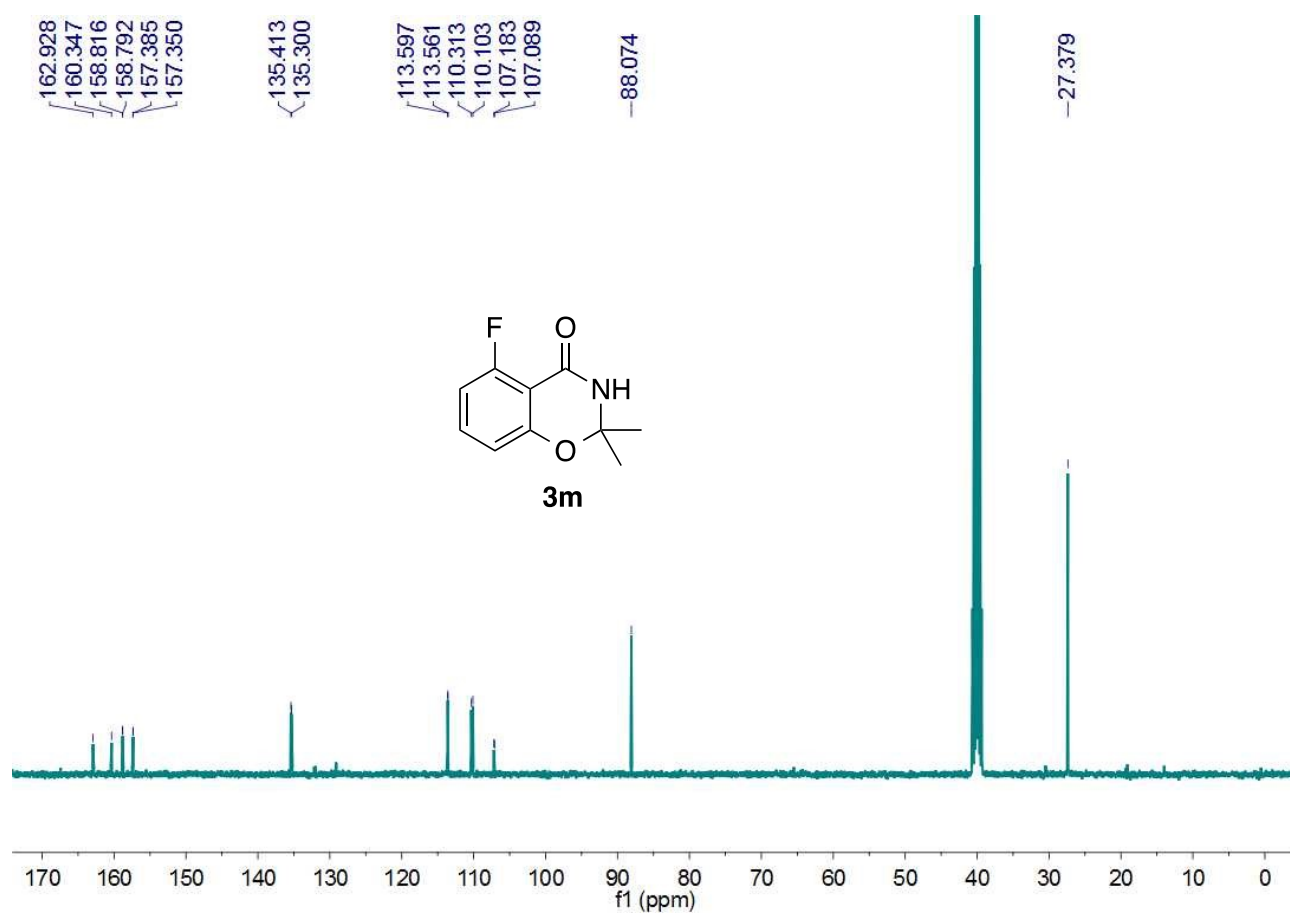

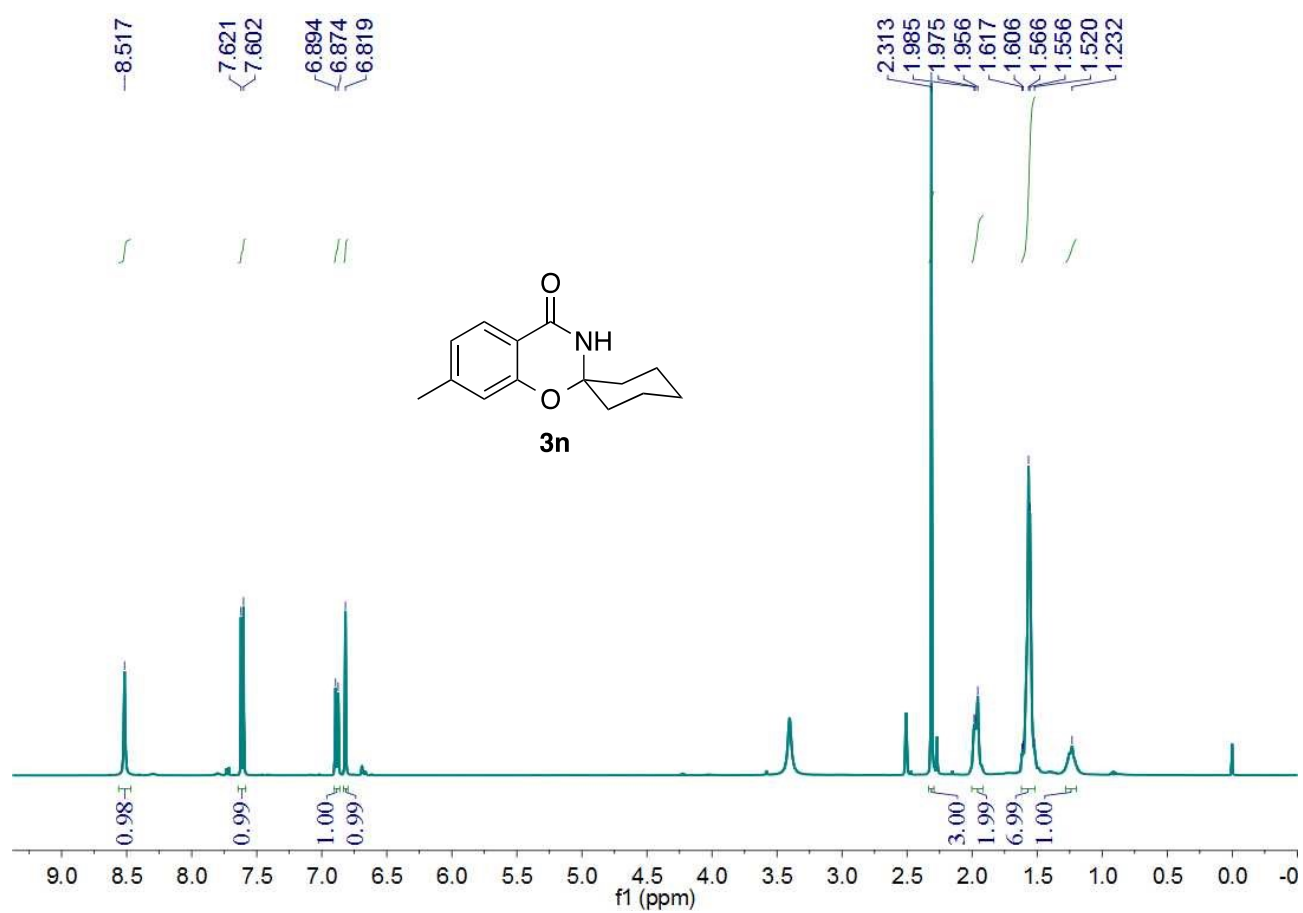

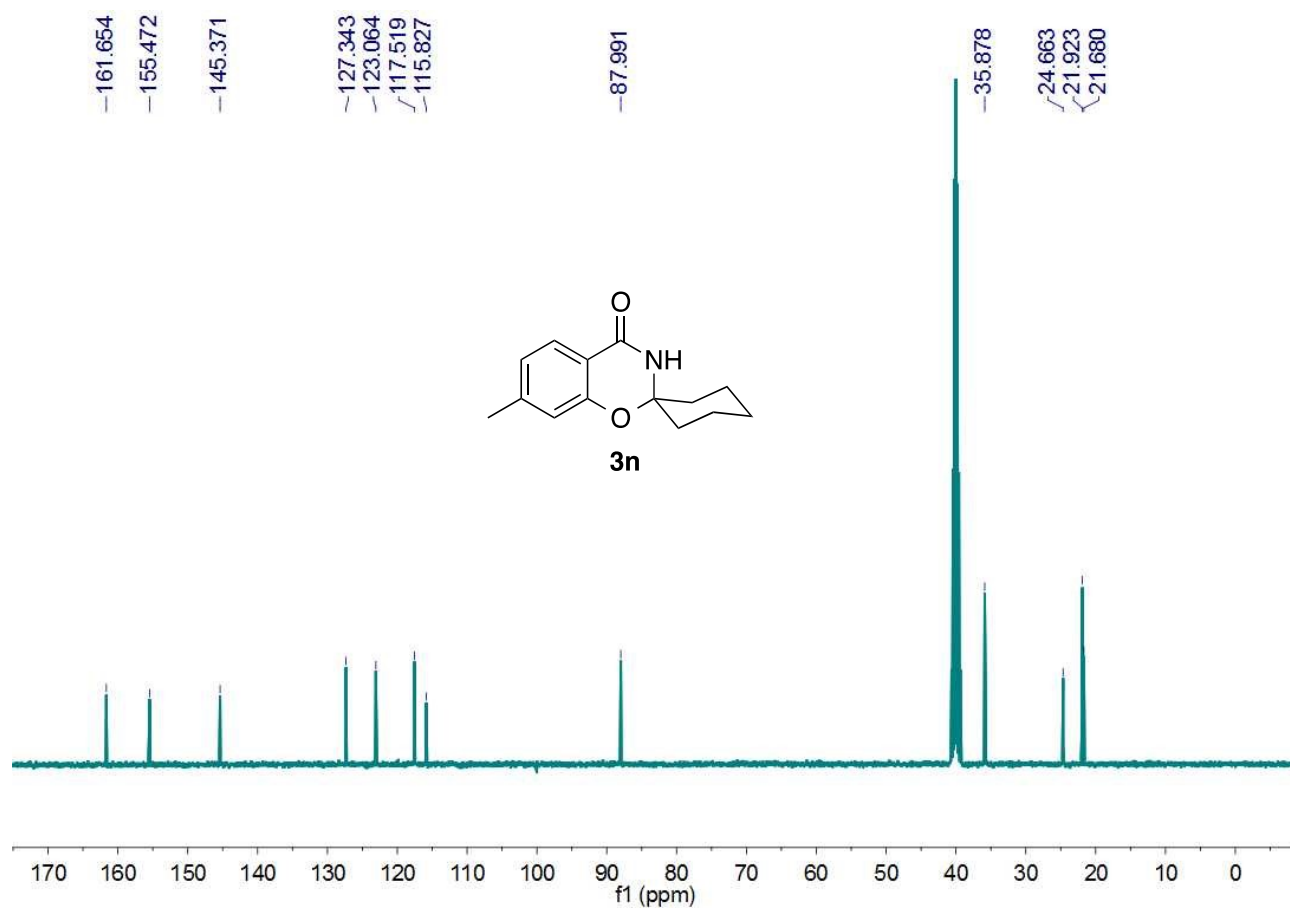

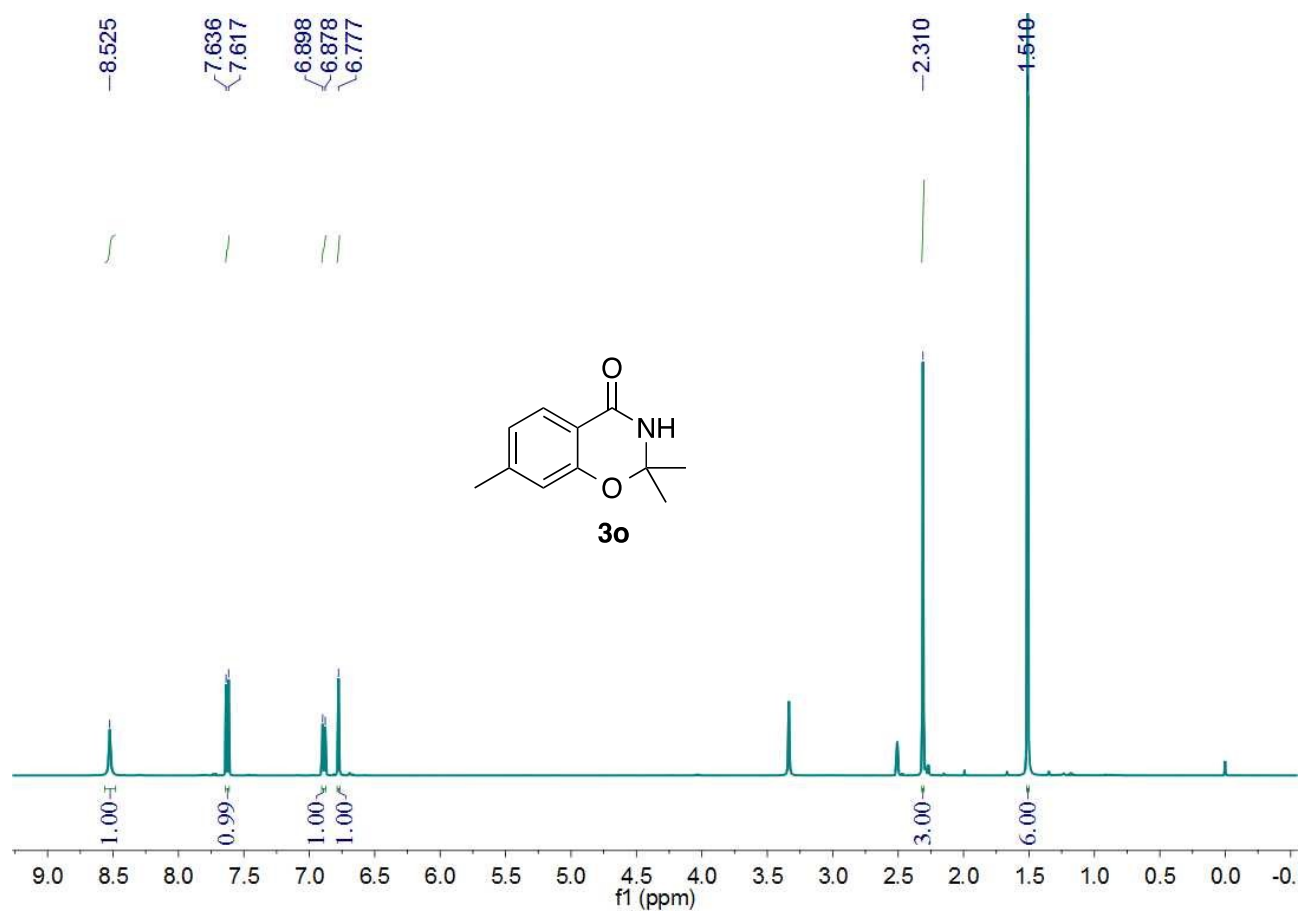



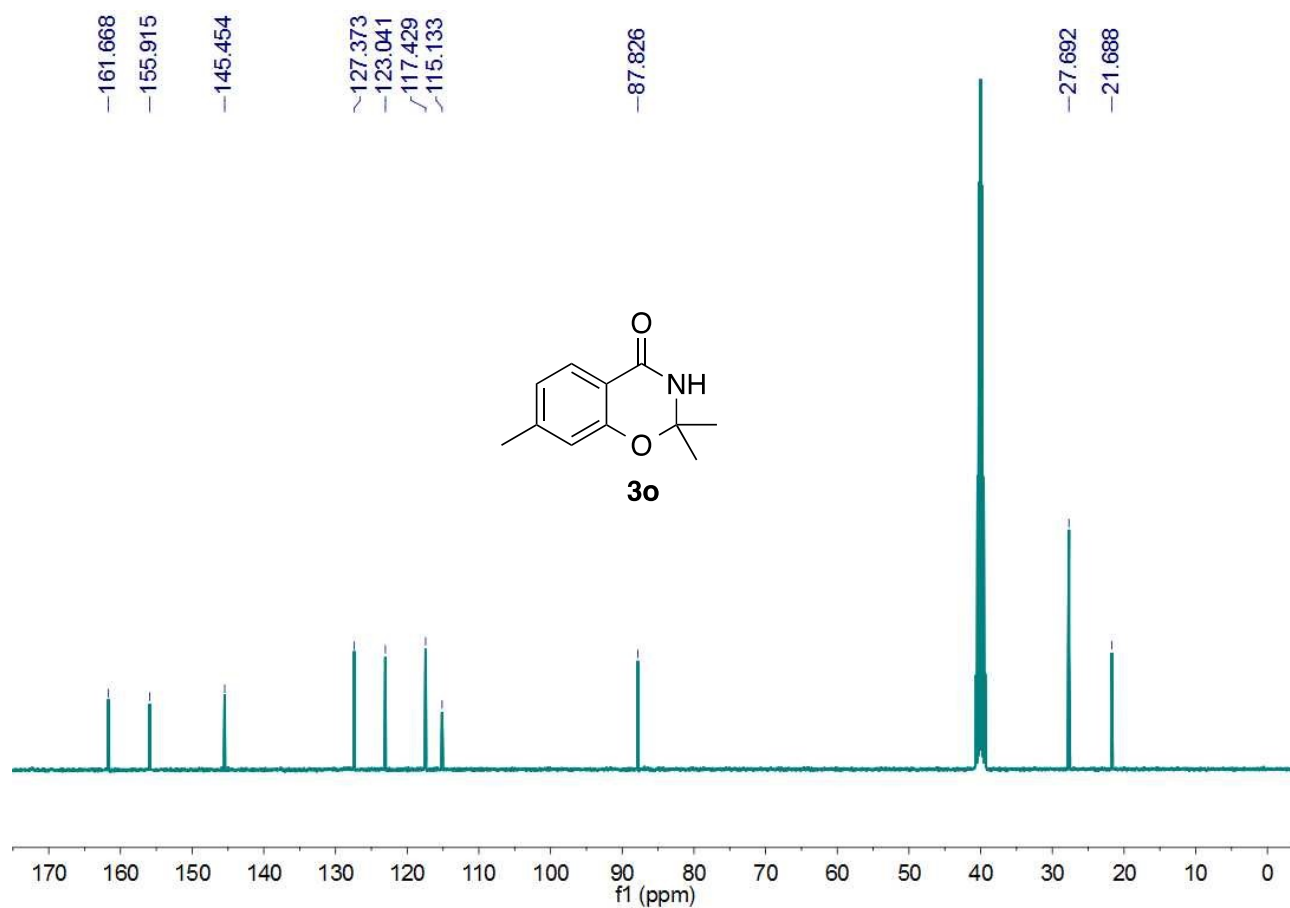

## HR-MS of new products

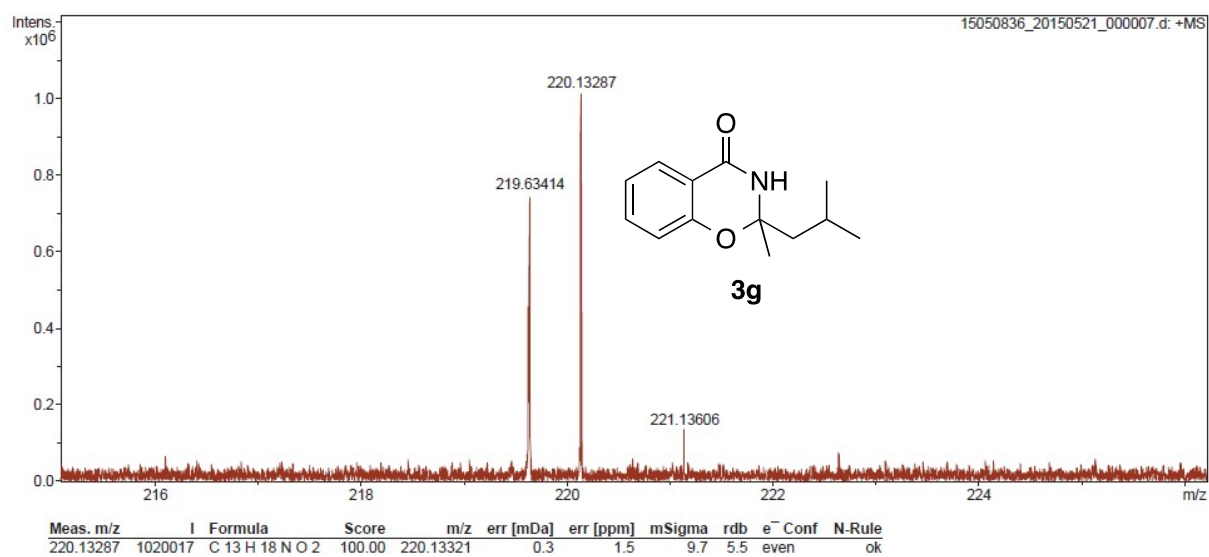

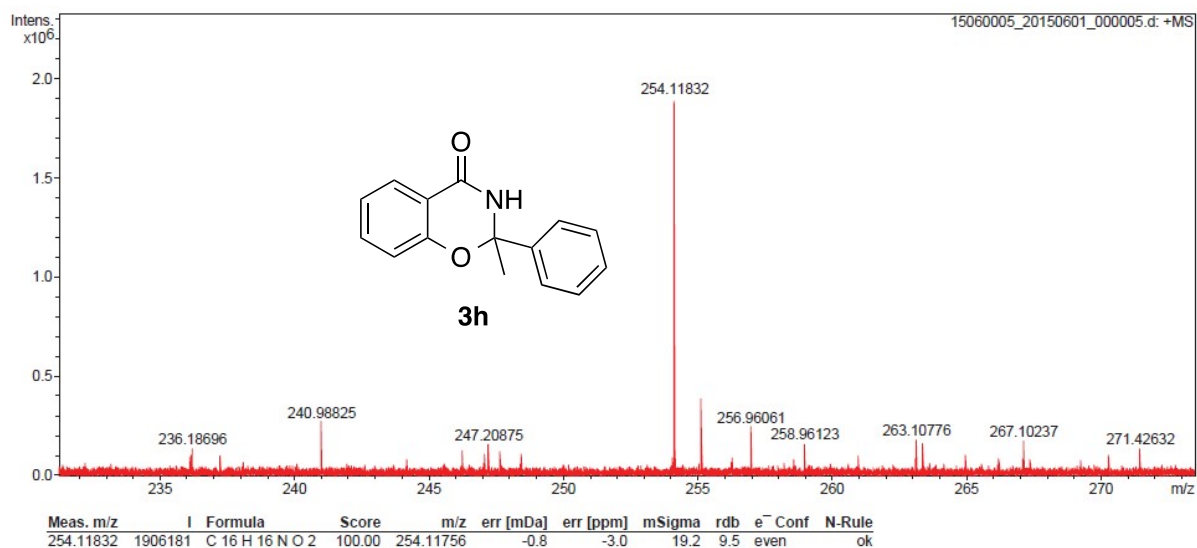

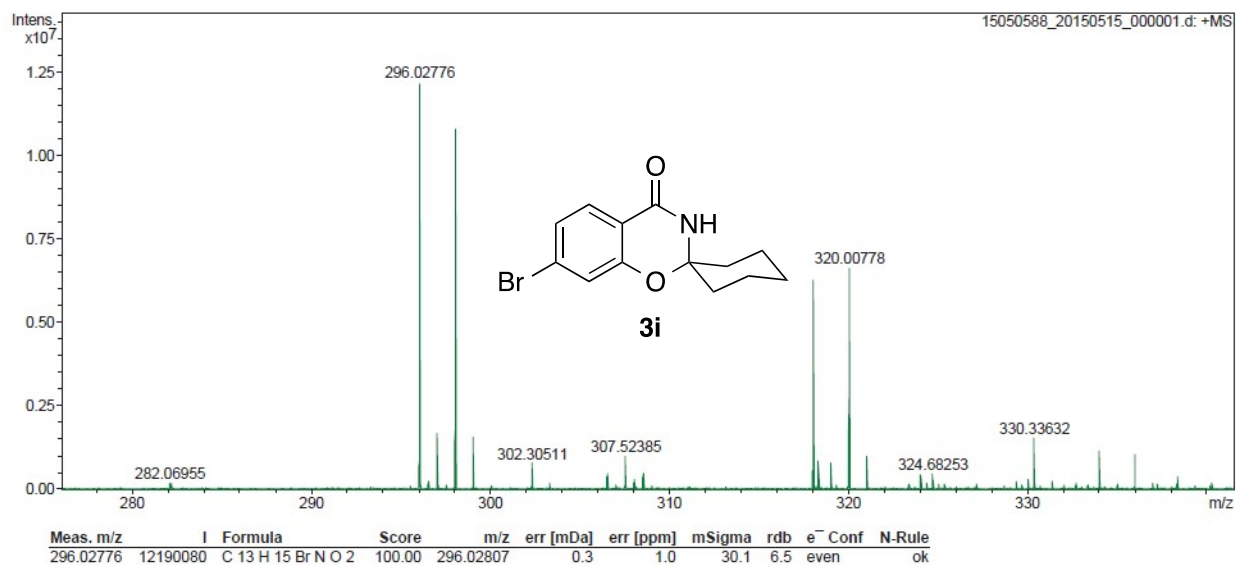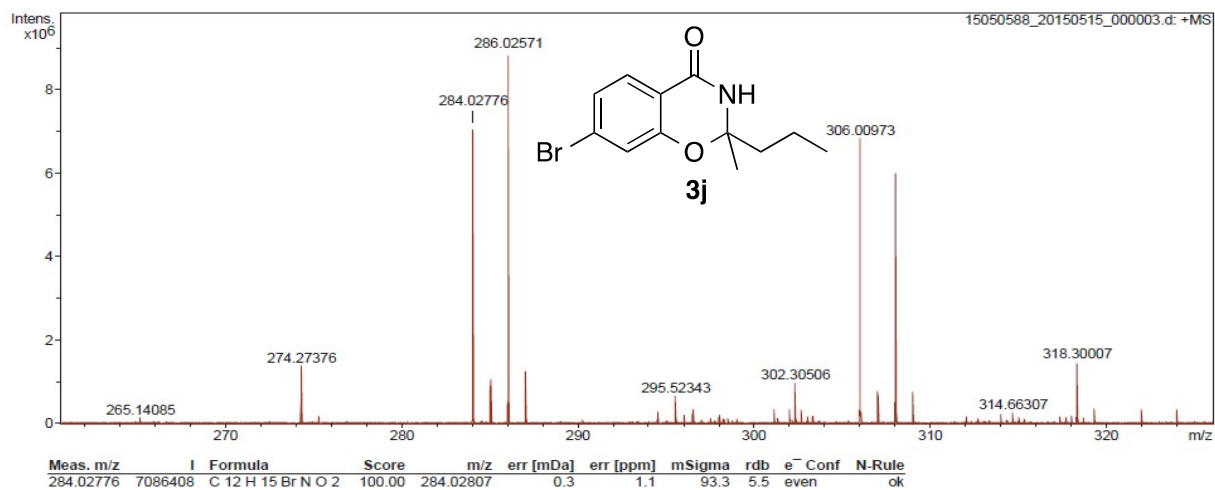

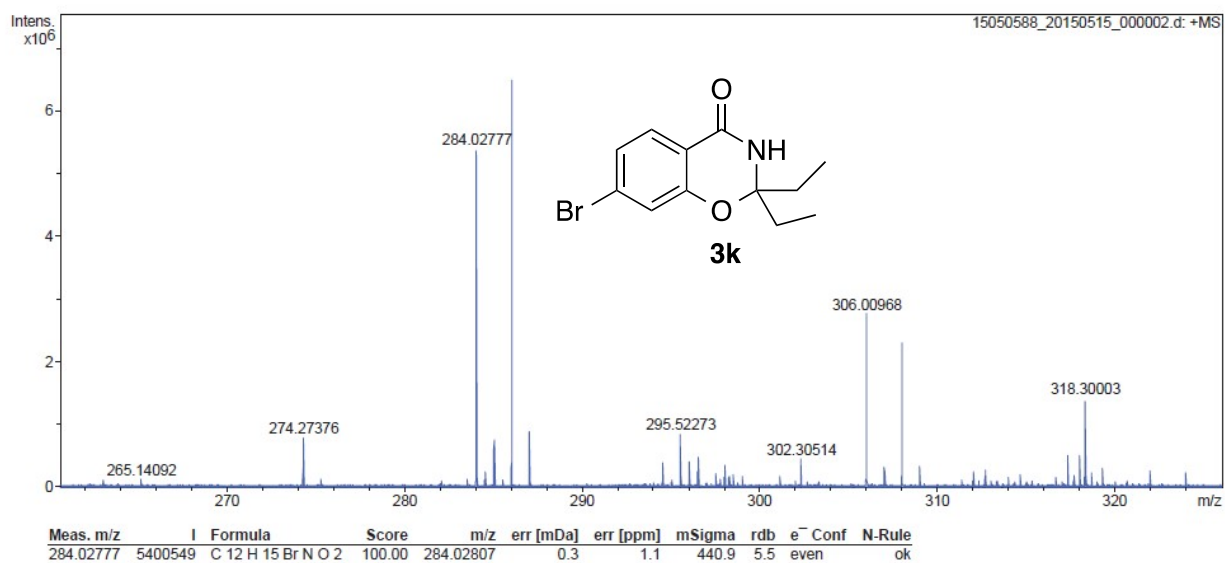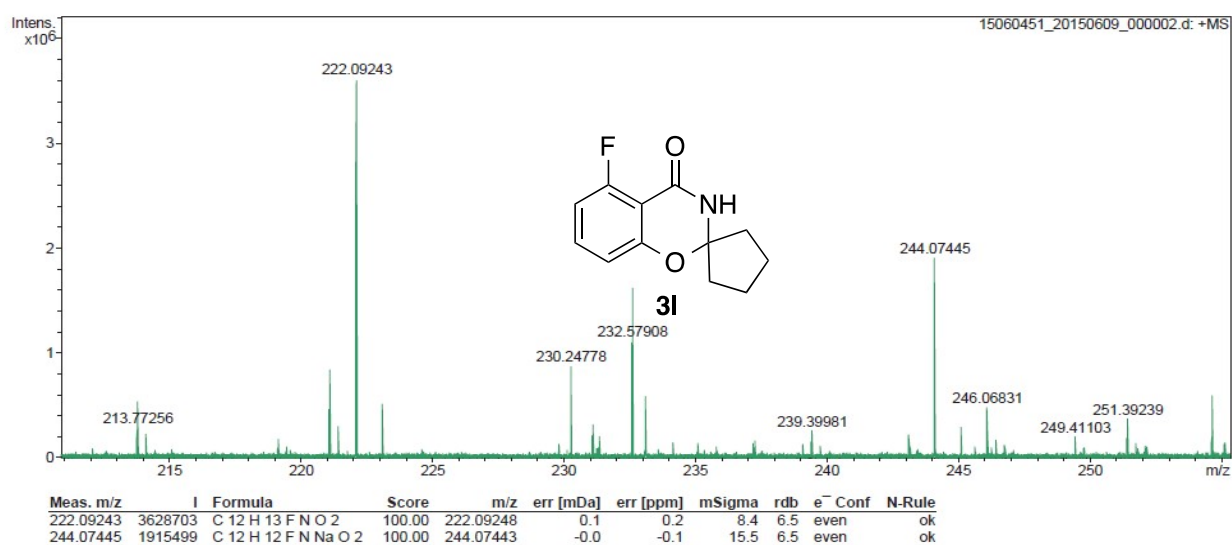

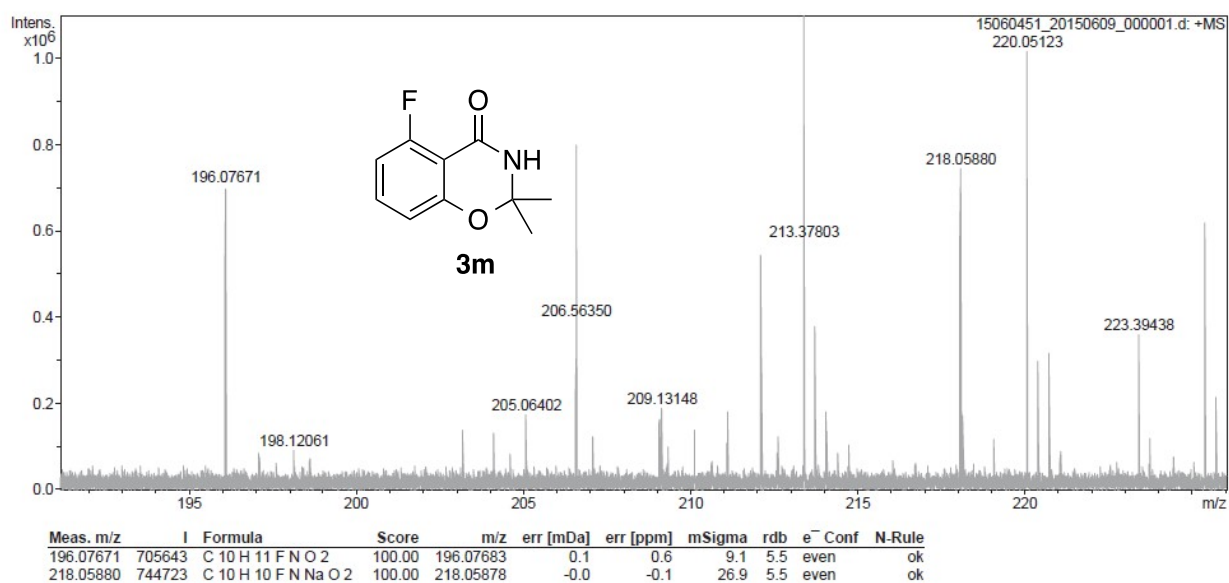

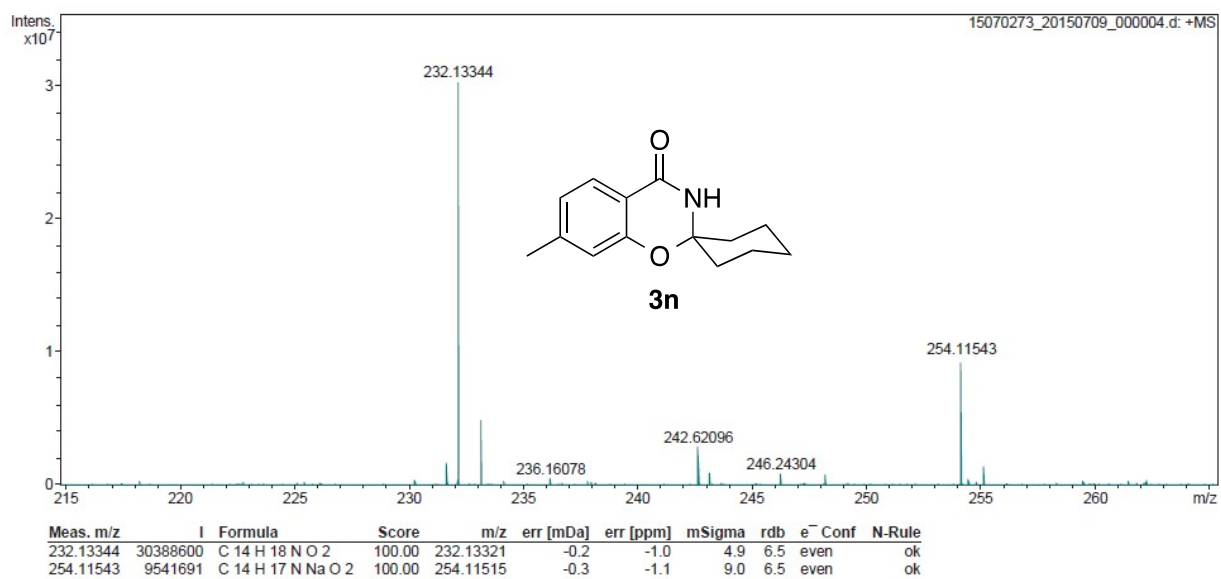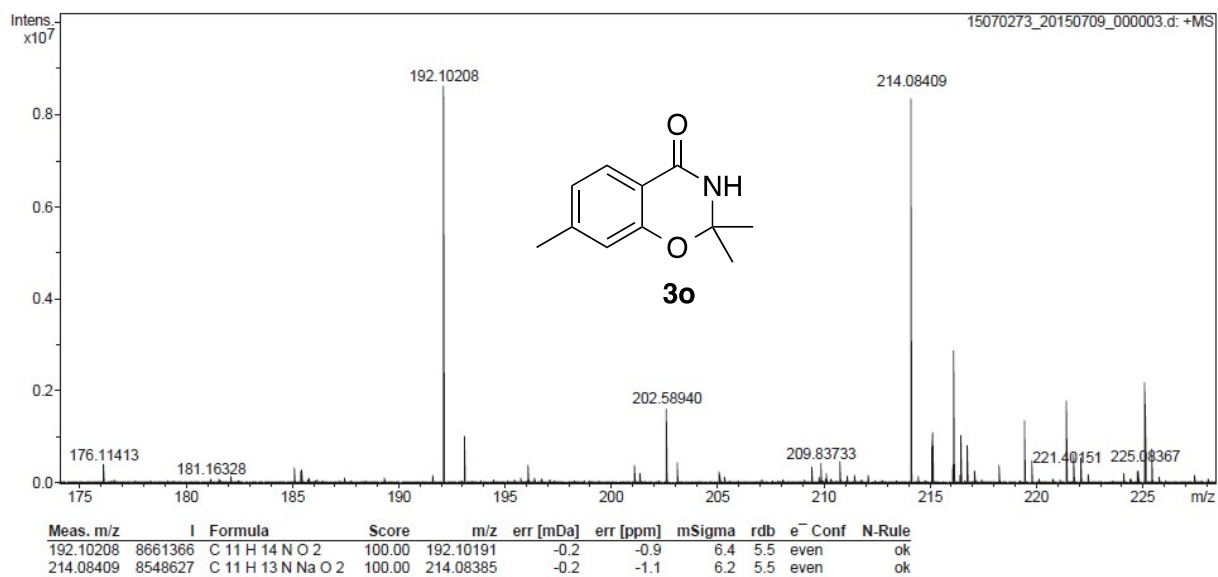

Supplement: d1ra04194k1.pdf [file d1ra04194k1.pdf]
